# Supplementary material
Source: PubMed Central journal article supplement (PMC7825217)
Supplement: 12859_2020_3950_MOESM1_ESM.pdf [file 12859_2020_3950_MOESM1_ESM.pdf]

# SNF-NN: Computational Method To Predict Drug-Disease Interactions Using Similarity Network Fusion and Neural Networks

## Supplementary Material

Tamer N. Jarada\*, Jon G. Rokne\* and Reda Alhajj\*<sup>†</sup> ■

\*Department of Computer Science, University of Calgary, Calgary, Alberta, Canada

<sup>†</sup>Department of Computer Engineering, Istanbul Medipol University, Istanbul, Turkey

■Department of Health Informatics, University of Southern Denmark, Odense, Denmark

Contact author: Reda Alhajj, email: alhajj <at> ucalgary.ca

## SND Benchmark Dataset

### 1 Drug-related similarity data

#### 1.1 Drug Target Protein Interactions

Drugs tend to target human proteins via binding in order to enhance or inhibit biological functions performed by those proteins and, thus, affect the disease conditions and achieve desirable therapeutic effects.

Drug target protein interaction and bioactivity data were acquired from six widely used data sources. Drug-target interactions were retrieved from the DrugBank Database [1], Therapeutic Target Database (TTD) [2], and the Pharmacogenetics and Pharmacogenomics Knowledge Base (PharmGKB) [3]. Drug-target bioactivity data was retrieved from ChEMBL [4], the International Union of Basic and Clinical Pharmacology/British Pharmacological Society (IUPHAR/BPS) Guide to Pharmacology [5], and BindingDB [6]. The collected data was processed so that drug-target interactions were retained if the following criteria were satisfied:

- Human proteins are:

- 
- Represented by unique UniProt Accession Number (AC) [7].
  - Annotated as “reviewed” in the UniProtKB Database [8].
  - Protein-ligand complexes have the following binding affinity values:
    - Inhibition Constant/Potency ( $K_i$ ) affinity  $\leq 10$  Micromolar ( $\mu M$ ).
    - Dissociation Constant ( $K_d$ ) affinity  $\leq 10$  ( $\mu M$ ).
    - Median Effective Concentration ( $EC_{50}$ ) affinity  $\leq 10$  ( $\mu M$ ).
    - Median Inhibitory Concentration ( $IC_{50}$ ) affinity  $\leq 10$  ( $\mu M$ ).

A binary matrix was constructed to represent the drug-target protein interactions where each drug  $r$  is represented as a binary feature vector of UniProt target proteins, and the absence or presence of a drug-target relationship is denoted by 0 or 1, respectively.

Drugs with similar target proteins are more likely to have common biological functions and, therefore, share therapeutic indications. The similarity between drug pairs was calculated using the Jaccard coefficient and human target proteins.

$$S_{(jaccard)}(r_i, r_j) = \frac{|f(r_i) \cap f(r_j)|}{|f(r_i)| + |f(r_j)| - |f(r_i) \cap f(r_j)|}$$

where  $|f(r_i)|$  and  $|f(r_j)|$  are the total numbers of features in  $r_i$  and  $r_j$ , respectively. The intersection  $|f(r_i) \cap f(r_j)|$  represents the number of common features between  $r_i$  and  $r_j$ . The  $S_{(jaccard)}$  value is in the range  $[0, 1]$ .

## 1.2 Drug Side Effects

Drug side effects or Adverse Drug Events (ADEs) resulting from off-targets present the ability of profiling human phenotypic traits related to drugs and eventually help to identify novel therapeutic uses for these drugs.

Drug side effects or clinically reported ADEs information was collected from SIDER Database [9], MetaADEDB [10], OFFSIDES [11], and CTD [12]. The retrieved data were annotated using DBANs, Medical Subject Headings (MeSH) [13], and Unified Medical Language System (UMLS) [14], which integrates many health and biomedical standards and vocabularies. Subsequently, the collected data was processed to exclude all duplicated drug-side-effect associations.

A binary matrix was constructed to represent the drug-side-effect associations where each drug  $r$  is represented as a binary feature vector of MeSH Unique ID of ADEs, and the absence or presence of a drug-ADE association is denoted by 0 or 1, respectively.

---

Drugs with similar ADEs are more probably to have common target proteins and therefore share similar underlying pathways. The similarity between drug pairs was calculated using the Jaccard coefficient and ADEs.

### 1.3 Drug Chemical Structures

Drug chemical structure information tends to point towards any transcriptional response similarity between drugs, and thus it is a powerful source of information for therapeutic repositioning opportunities.

Drug 2D chemical structure information was retrieved from PubChem [15]. Subsequently, CDK [16] was used to encode each drug into a binary feature vector of PubChem substructures.

A binary matrix was constructed to represent the drug-chemical-substructure associations where each drug  $r$  is represented as a binary feature vector of PubChem 2D chemical substructures, and the absence or presence of a drug-chemical-substructure association is denoted by 0 or 1, respectively.

Drugs with similar chemical structures are anticipated to have similar biological indications and, therefore, cure common diseases. The similarity between drug pairs was calculated using the Jaccard coefficient and the 2D chemical fingerprint descriptor.

### 1.4 Drug GO Annotation Targets

GO annotation describes the Molecular Functions (MF), Biological Processes (BP) and Cellular Components (CC) of genes and gene products and, therefore, provides a useful insight into the biology and functional interpretation of genes and gene products. Such insight significantly supports initiatives of identifying new therapeutic uses for existing drugs.

GO annotations of drug target-coding genes were obtained from the Gene Ontology Consortium Database [17]. Experimentally validated and literature-derived information (i.e., molecular functions, biological processes, cellular components) was utilized while computationally annotated information was kept out.

Binary matrices were constructed to represent the three drug pairwise semantic similarities where each drug  $r$  in the MF, BP, and CC semantic similarity matrices is represented as a binary feature vector the GO molecular function terms, GO biological process terms, and GO cellular component terms, respectively.

Drugs with semantic similar target-coding genes appear to share similar underlying mechanisms. The MF, BP, and CC semantic similarities between drug pairs were calculated using the information-based measure proposed in [18].

---

## 1.5 Drug Metabolism Enzymes

Drug metabolism refers to the set of biochemical processes and metabolic breakdown of drugs within any living organism. Drug metabolism is usually represented by the enzymatic alteration caused by the drug; hence, it can help identify similarities between drugs.

Drug metabolism enzymes information was retrieved from the Human Metabolome Database (HMDB) [19].

A binary matrix was constructed to represent the drug-metabolism-enzyme associations where each drug  $r$  is represented as a binary feature vector of enzymes, and the absence or presence of a drug-metabolism-enzyme association is denoted by 0 or 1, respectively.

Drugs with similar metabolism enzymes are more likely to share similar underlying pathways. The similarity between drug pairs was calculated using the Jaccard coefficient and metabolism enzymes.

## 1.6 Drug Protein Sequences

Drug protein sequence information refers to the amino acid sequence information of a protein, or part of a protein, which characterizes the protein post-translational modifications. Such information helps in studying the similarity between drugs and thus identifying novel drug repositioning candidates.

Drug target protein sequences were obtained from UniProt/SWISS-PROT KnowledgeBase [20] and KEGG [21].

A binary matrix was constructed to represent the drug-protein sequence associations, where each drug  $r$  is represented by a binary feature vector of protein sequences, and the absence or presence of a drug-protein-sequence association is denoted by 0 or 1, respectively.

Drugs with similar protein amino acid sequences tend to share common functional mechanisms. The similarity between drug pairs was calculated using the normalized average of the SW sequence alignment similarity scores of proteins [22].

$$S_{(proteins)}(r_a, r_b) = \frac{\sum_{i=1}^{|p(r_a)|} \sum_{j=1}^{|p(r_b)|} SW(p_i(r_a), p_j(r_b))}{|p(r_a)||p(r_b)|}$$

where  $p(r_a)$  and  $p(r_b)$  represent the target protein sets of drugs  $r_a$  and  $r_b$ , respectively;  $|p(r_a)|$  and  $|p(r_b)|$  are the total numbers of target proteins of drugs  $r_a$  and  $r_b$ , respectively, and  $SW(p_i(r_a), p_j(r_b))$  is the sequence alignment similarity score between the two proteins  $p_i(r_a)$  and  $p_j(r_b)$ . The  $S_{(proteins)}$  value is in the range [0, 1].

---

## 1.7 Drug Anatomical Therapeutic Chemical Classification Codes

The Anatomical Therapeutic Chemical (ATC) classification system divides the active drug substances into different groups based on their organ or system on which they act as well as their therapeutic effect, pharmacological activities, and chemical characteristics. The ATC classification system consists of five different classification levels: (i) main anatomical or pharmacological groups, (ii) pharmacological or therapeutic subgroups, (iii) & (iv) chemical, pharmacological or therapeutic subgroups, and (v) chemical substances. Such a classification system provides useful insight into drugs and helps in predicting novel drug targets.

Drug-ATC classification codes were collected from the DrugBank Database [1].

A binary matrix was constructed to represent the drug-ATC classification code associations, where each drug  $r$  is represented by a binary feature vector of ATC classification codes, and the absence or presence of a drug-ATC association is denoted by 0 or 1, respectively.

Drugs with similar structures and classification codes appear to have similar medical indications. The similarity between drug pairs was calculated using the similarity measure proposed in [10].

## 1.8 Drug Pairwise Interactions

Drug-Drug Interactions (RRIs) refer to the adverse effects that may result from the concurrent consumption of two or more drugs. RRIs play a significant role in delaying, decreasing, or enhancing the absorption and expected molecular alterations of the concurrent consumed drugs.

Drug-drug interactions were collected from the DrugBank Database [1].

A binary adjacency matrix was constructed to represent the drug-drug interactions, where each drug  $r$  is represented by a binary feature vector of drugs, and the absence or presence of an RRI is denoted by 0 or 1, respectively.

Drugs with interactive chemicals are anticipated to have similar characteristics and biological functions.

## 2 Disease-related similarity data

### 2.1 Disease Genes

Disease-Gene Associations (DGAs) describe the relationships between genetic diseases and the genes associated with them. Such associations help in understanding the underlying mechanism of complex diseases, and therefore they support the efforts of developing preventive and therapeutic solutions.

Curated disease-gene associations were collected from UniProt/SWISS-PROT KnowledgeBase [20], the Comparative Toxicogenomics Database (CTD) [23], and the Clinical Genome Resource (ClinGen)

---

[24]. Genes were mapped to their UniProt accession numbers [7].

Human Phenotype Ontology (HPO) disease-gene associations were also retrieved from the HPO KnowledgeBase [25]. Diseases were mapped from their Disease Ontology Identifiers (DOIDs) to their UMLS’s concept unique identifiers.

Literature-based disease-gene associations were extracted from Medline abstracts published in the period (January 1970-December 2019) using the BeFree text mining tool [26]. BeFree consists of two modules, namely Biomedical Named Entity Recognition (BioNER) and Relation Extraction (RE). BioNER utilizes gene and disease dictionaries to apply fuzzy and pattern matching methods in order to recognize gene and disease entities mentioned in the literature [27]. Subsequently, RE identifies DGAs using the exploitation of semantic and morphosyntactic information from the text extracted from the literature [28]. Genes were mapped to their UniProt accession numbers [7].

Binary matrices were constructed to represent the curated, HPO, and literature-based DGAs where each disease  $d$  is represented as a binary feature vector of genes, and the absence or presence of a DGA is denoted by 0 or 1, respectively.

Diseases associated with similar genes tend to share similar underlying mechanisms. The similarity between disease pairs was calculated using the Jaccard coefficient and curated, HOP, and literature-based genes, separately.

## 2.2 Disease Variants

Disease-Variant Associations (DVAs) relate to the relationships between genetic diseases and the genetic variants associated with them. Variants refer to the gene’s DNA sequence changes that are caused by a disease. Gene variants can alter the gene functionality (e.g., produce a non-functioning protein) and, thus, provide useful insight into disease conditions.

Curated disease-variant associations were obtained from UniProt/SWISS-PROT KnowledgeBase [20] and the GWASdb Database of human genetic variants identified by genome-wide association studies [29]. Variants were mapped to their Single Nucleotide Polymorphisms (SNPs) using the NCBI Database of Genetic Variation (dbSNP) [30].

Literature-based disease-variant associations were extracted from Medline abstracts published in the period (January 1970-December 2019) using both the SETH text mining tool [31] and the BeFree tool. SETH extracts gene variants and maps them to their dbSNP’s SNPs, while the RE module of the BeFree tool identifies DVAs from the extracted information.

Binary matrices were constructed to represent the curated and literature-based DVAs where each disease  $d$  is represented as a binary feature vector of variants, and the absence or presence of a DVA is denoted by 0 or 1, respectively.

---

Diseases associated with similar variants are expected to share similar underlying pathways. The similarity between disease pairs was calculated using the Jaccard coefficient and curated and literature-based variants, separately.

### 2.3 Disease MicroRNAs

Disease-MicroRNA Associations (DMAs) refer to the single-stranded non-coding RNA sequences associated with a disease. MicroRNAs (miRNAs) regulate up to 60% of protein-encoding genes. They are also considered as key mediators of the host response to diseases [32].

Disease-microRNA associations were collected from the DincRNA Database [33]. Diseases were mapped from their DOIDs to their UMLS's CUIs.

A binary matrix was constructed to represent the disease-miRNA associations, where each disease  $d$  is represented by a binary feature vector of miRNAs, and the absence or presence of a DMA is denoted by 0 or 1, respectively.

Diseases that affect similar miRNAs are expected to have similar underlying pathways. The similarity between disease pairs was calculated using the Jaccard coefficient and miRNAs.

### 2.4 Disease Long Non-coding RNAs

Disease-Long Non-coding RNAs Associations (DLAs) describe the relationship between the genetic diseases and the Long Non-coding RNAs (lncRNAs) associated with them. lncRNAs are RNA transcripts with lengths exceeding 200 nucleotides. Despite lacking protein-coding potential, lncRNAs are emerging as important regulators in gene expression networks for their roles in modulating mRNA stability and controlling nuclear architecture and transcription as well as translation and post-translational modifications in the cytoplasm [34].

Disease-lncRNAs associations were collected from the DincRNA Database [33]. Diseases were mapped from their DOIDs to their UMLS's CUIs.

A binary matrix was constructed to represent the disease-lncRNA associations, where each disease  $d$  is represented by a binary feature vector of lncRNAs, and the absence or presence of a DLA is denoted by 0 or 1, respectively.

Diseases with similar lncRNAs tend to share similar cellular functional effects. The similarity between disease pairs was calculated using the Jaccard coefficient and lncRNAs.

---

## 2.5 Disease HPO Phenotypes

Disease phenotypes present the observable characteristics of the disease and tend to describe the quality of an organism (e.g., morphology, development, behaviour) as opposed to the organism’s genotype [35].

Disease phenotypes associations were retrieved from the HPO KnowledgeBase [25]. Diseases were mapped from their DOIDs to their UMLS’s CUIs.

A binary matrix was constructed to represent the disease-phenotype associations, where each disease  $d$  is represented by a binary feature vector of phenotypes, and the absence or presence of a phenotype is denoted by 0 or 1, respectively.

Diseases can be defined using their phenotypes; therefore, diseases with similar phenotypes are anticipated to share similar underlying pathways. The similarity between disease pairs was calculated using the Jaccard coefficient and phenotypes.

## 2.6 Inferred Disease-Disease Associations

Inferred disease pairwise similarity methods raise great attention lately for their key role in identifying disease-causing genes [36] and predicting novel drug indications [37]. Such computational methods quantify the shared characteristics of disease pairs based on semantic and/or functional information. Semantic-based methods use terms of gene ontology [38] and human phenotype ontology [25] to calculate pairwise disease similarity, while function-based methods use functional associations of disease genetic entities (e.g., genes, miRNAs, lncRNAs) [39].

Inferred Disease-Disease Associations (IDDAs) based on six different computational methods, namely Resnik, Lin, Wang, PSB, SemFunSim, and DisGeNET, were collected from the DincRNA Database [33] and the DisGeNET KnowledgeBase [40]. Diseases in all IDDAs datasets were mapped from their DOIDs to their UMLS’s CUIs.

Resnik [41] introduced a semantic similarity measure in an IS-A taxonomy based on the notion of information content. However, Lin [42] used information-theoretic definition to compute semantic pairwise similarity scores. Moreover, Wang [43] developed a novel semantic similarity measure based on Go terms. Furthermore, Mathur [44] leveraged implicit semantic similarity to propose the PSB similarity measure. In addition, Cheng [45] integrated semantic and gene functional information to present the SemFunSim similarity measure. Finally, Piñero [40] utilized curated disease genes and variants to compute disease pairwise similarity reported in the DisGeNET KnowledgeBase.

Binary adjacency matrices were constructed to represent the disease-disease associations, where each disease  $d$  is represented by a binary feature vector of diseases, and the absence or presence of an IDDA is denoted by 0 or 1, respectively.



---

Diseases with high similarity scores are anticipated to have similar characteristics, genomic effects, and underlying pathways.

Table 1 summarizes the performance metrics of all trained deep neural network models with their hyperparameters settings

| Number of hidden layers | Number of neurons | Dropout rate | Activation function | AUC   | AUC-PR | F-score | Prec  | Rec   | Spec  | Acc   | MCC   |
|-------------------------|-------------------|--------------|---------------------|-------|--------|---------|-------|-------|-------|-------|-------|
| 4                       | 300               | 0.35         | ReLU                | 0.790 | 0.800  | 0.726   | 0.725 | 0.728 | 0.724 | 0.726 | 0.452 |
| 3                       | 200               | 0.4          | ReLU                | 0.786 | 0.790  | 0.732   | 0.714 | 0.750 | 0.700 | 0.725 | 0.451 |
| 2                       | 100               | 0.4          | ReLU                | 0.786 | 0.791  | 0.725   | 0.732 | 0.719 | 0.737 | 0.728 | 0.456 |
| 3                       | 100               | 0.4          | ReLU                | 0.785 | 0.793  | 0.730   | 0.733 | 0.728 | 0.735 | 0.731 | 0.462 |
| 1                       | 100               | 0.4          | ReLU                | 0.785 | 0.789  | 0.716   | 0.716 | 0.716 | 0.717 | 0.716 | 0.433 |
| 1                       | 300               | 0.3          | ReLU                | 0.784 | 0.791  | 0.726   | 0.731 | 0.721 | 0.735 | 0.728 | 0.455 |
| 1                       | 500               | 0.3          | ReLU                | 0.783 | 0.791  | 0.730   | 0.716 | 0.745 | 0.704 | 0.724 | 0.449 |
| 1                       | 400               | 0.45         | ReLU                | 0.782 | 0.786  | 0.726   | 0.727 | 0.724 | 0.728 | 0.726 | 0.452 |
| 2                       | 200               | 0.3          | ReLU                | 0.782 | 0.787  | 0.724   | 0.699 | 0.750 | 0.678 | 0.714 | 0.428 |
| 1                       | 500               | 0.5          | ReLU                | 0.782 | 0.790  | 0.723   | 0.733 | 0.713 | 0.739 | 0.726 | 0.453 |
| 1                       | 300               | 0.5          | ReLU                | 0.781 | 0.787  | 0.721   | 0.739 | 0.704 | 0.751 | 0.728 | 0.456 |
| 2                       | 200               | 0.4          | ReLU                | 0.781 | 0.787  | 0.718   | 0.716 | 0.720 | 0.715 | 0.718 | 0.435 |
| 4                       | 500               | 0.35         | ReLU                | 0.781 | 0.791  | 0.715   | 0.722 | 0.709 | 0.727 | 0.718 | 0.436 |
| 1                       | 400               | 0.3          | ReLU                | 0.781 | 0.789  | 0.725   | 0.729 | 0.721 | 0.732 | 0.727 | 0.453 |
| 1                       | 300               | 0.4          | ReLU                | 0.781 | 0.780  | 0.720   | 0.731 | 0.708 | 0.740 | 0.724 | 0.448 |
| 2                       | 300               | 0.5          | ReLU                | 0.780 | 0.787  | 0.709   | 0.744 | 0.678 | 0.767 | 0.722 | 0.446 |
| 3                       | 400               | 0.3          | ReLU                | 0.780 | 0.787  | 0.728   | 0.710 | 0.747 | 0.696 | 0.721 | 0.443 |
| 1                       | 200               | 0.5          | ReLU                | 0.780 | 0.785  | 0.726   | 0.731 | 0.721 | 0.735 | 0.728 | 0.455 |
| 2                       | 500               | 0.4          | ReLU                | 0.780 | 0.784  | 0.729   | 0.713 | 0.746 | 0.699 | 0.723 | 0.446 |
| 5                       | 500               | 0.5          | ReLU                | 0.780 | 0.785  | 0.724   | 0.722 | 0.727 | 0.720 | 0.723 | 0.446 |
| 2                       | 300               | 0.4          | ReLU                | 0.780 | 0.782  | 0.720   | 0.718 | 0.721 | 0.717 | 0.719 | 0.439 |
| 5                       | 200               | 0.35         | ReLU                | 0.780 | 0.781  | 0.723   | 0.717 | 0.729 | 0.711 | 0.720 | 0.441 |
| 5                       | 100               | 0.4          | ReLU                | 0.780 | 0.794  | 0.728   | 0.714 | 0.742 | 0.703 | 0.723 | 0.446 |
| 3                       | 300               | 0.4          | ReLU                | 0.779 | 0.785  | 0.727   | 0.679 | 0.783 | 0.630 | 0.707 | 0.418 |
| 4                       | 200               | 0.3          | ReLU                | 0.779 | 0.796  | 0.729   | 0.701 | 0.758 | 0.677 | 0.718 | 0.437 |
| 1                       | 100               | 0.35         | ReLU                | 0.779 | 0.783  | 0.716   | 0.716 | 0.716 | 0.716 | 0.716 | 0.432 |
| 3                       | 100               | 0.5          | ReLU                | 0.779 | 0.792  | 0.719   | 0.693 | 0.747 | 0.669 | 0.708 | 0.417 |
| 1                       | 500               | 0.4          | ReLU                | 0.779 | 0.783  | 0.724   | 0.704 | 0.744 | 0.687 | 0.716 | 0.433 |
| 3                       | 200               | 0.45         | ReLU                | 0.779 | 0.782  | 0.716   | 0.706 | 0.727 | 0.697 | 0.712 | 0.424 |
| 5                       | 400               | 0.35         | ReLU                | 0.779 | 0.784  | 0.727   | 0.714 | 0.739 | 0.704 | 0.722 | 0.444 |
| 4                       | 300               | 0.35         | ReLU                | 0.779 | 0.787  | 0.723   | 0.730 | 0.717 | 0.735 | 0.726 | 0.452 |
| 2                       | 300               | 0.35         | ReLU                | 0.779 | 0.780  | 0.725   | 0.720 | 0.730 | 0.716 | 0.723 | 0.446 |
| 1                       | 500               | 0.45         | ReLU                | 0.779 | 0.784  | 0.719   | 0.707 | 0.731 | 0.696 | 0.714 | 0.428 |
| 3                       | 300               | 0.3          | ReLU                | 0.778 | 0.784  | 0.724   | 0.703 | 0.746 | 0.685 | 0.715 | 0.431 |
| 4                       | 200               | 0.35         | ReLU                | 0.778 | 0.781  | 0.720   | 0.730 | 0.710 | 0.737 | 0.724 | 0.447 |
| 1                       | 300               | 0.45         | ReLU                | 0.778 | 0.782  | 0.716   | 0.716 | 0.716 | 0.716 | 0.716 | 0.432 |
| 2                       | 400               | 0.5          | ReLU                | 0.778 | 0.781  | 0.719   | 0.700 | 0.739 | 0.683 | 0.711 | 0.423 |
| 3                       | 300               | 0.35         | ReLU                | 0.778 | 0.778  | 0.721   | 0.706 | 0.737 | 0.693 | 0.715 | 0.431 |
| 1                       | 400               | 0.35         | ReLU                | 0.778 | 0.785  | 0.719   | 0.704 | 0.734 | 0.691 | 0.713 | 0.426 |

Continued on next page

Table 1 – continued from previous page

| Number of hidden layers | Number of neurons | Dropout rate | Activation function | AUC   | AUC-PR | F-score | Prec  | Rec   | Spec  | Acc   | MCC   |
|-------------------------|-------------------|--------------|---------------------|-------|--------|---------|-------|-------|-------|-------|-------|
| 1                       | 100               | 0.5          | ReLU                | 0.778 | 0.783  | 0.713   | 0.727 | 0.698 | 0.738 | 0.718 | 0.437 |
| 4                       | 200               | 0.45         | ReLU                | 0.778 | 0.783  | 0.718   | 0.707 | 0.730 | 0.697 | 0.713 | 0.427 |
| 2                       | 400               | 0.45         | ReLU                | 0.778 | 0.787  | 0.714   | 0.713 | 0.714 | 0.713 | 0.714 | 0.427 |
| 2                       | 500               | 0.3          | ReLU                | 0.777 | 0.780  | 0.719   | 0.706 | 0.733 | 0.694 | 0.714 | 0.428 |
| 2                       | 400               | 0.3          | ReLU                | 0.777 | 0.778  | 0.726   | 0.689 | 0.767 | 0.654 | 0.710 | 0.424 |
| 3                       | 200               | 0.3          | ReLU                | 0.777 | 0.783  | 0.717   | 0.707 | 0.727 | 0.698 | 0.713 | 0.425 |
| 3                       | 100               | 0.45         | ReLU                | 0.777 | 0.785  | 0.714   | 0.710 | 0.718 | 0.707 | 0.713 | 0.426 |
| 1                       | 200               | 0.35         | ReLU                | 0.777 | 0.780  | 0.719   | 0.682 | 0.759 | 0.647 | 0.703 | 0.408 |
| 4                       | 200               | 0.4          | ReLU                | 0.777 | 0.785  | 0.722   | 0.708 | 0.737 | 0.696 | 0.716 | 0.433 |
| 1                       | 100               | 0.45         | ReLU                | 0.777 | 0.777  | 0.713   | 0.711 | 0.715 | 0.709 | 0.712 | 0.424 |
| 5                       | 300               | 0.45         | ReLU                | 0.777 | 0.779  | 0.723   | 0.682 | 0.768 | 0.642 | 0.705 | 0.414 |
| 3                       | 500               | 0.35         | ReLU                | 0.777 | 0.781  | 0.719   | 0.707 | 0.732 | 0.697 | 0.714 | 0.429 |
| 4                       | 500               | 0.45         | ReLU                | 0.777 | 0.781  | 0.719   | 0.725 | 0.713 | 0.729 | 0.721 | 0.442 |
| 1                       | 100               | 0.4          | ReLU                | 0.777 | 0.779  | 0.711   | 0.709 | 0.713 | 0.708 | 0.711 | 0.421 |
| 3                       | 400               | 0.5          | ReLU                | 0.777 | 0.779  | 0.716   | 0.731 | 0.702 | 0.742 | 0.722 | 0.443 |
| 5                       | 400               | 0.5          | ReLU                | 0.777 | 0.782  | 0.722   | 0.713 | 0.732 | 0.705 | 0.718 | 0.437 |
| 3                       | 200               | 0.5          | ReLU                | 0.777 | 0.784  | 0.709   | 0.737 | 0.684 | 0.756 | 0.720 | 0.441 |
| 1                       | 400               | 0.5          | ReLU                | 0.777 | 0.779  | 0.719   | 0.713 | 0.725 | 0.708 | 0.717 | 0.434 |
| 2                       | 400               | 0.4          | ReLU                | 0.777 | 0.780  | 0.717   | 0.715 | 0.719 | 0.714 | 0.716 | 0.433 |
| 5                       | 300               | 0.5          | ReLU                | 0.777 | 0.786  | 0.720   | 0.676 | 0.771 | 0.630 | 0.701 | 0.405 |
| 3                       | 400               | 0.4          | ReLU                | 0.777 | 0.784  | 0.726   | 0.699 | 0.755 | 0.675 | 0.715 | 0.431 |
| 4                       | 400               | 0.35         | ReLU                | 0.777 | 0.781  | 0.721   | 0.711 | 0.730 | 0.704 | 0.717 | 0.434 |
| 1                       | 200               | 0.3          | ReLU                | 0.776 | 0.779  | 0.714   | 0.705 | 0.723 | 0.697 | 0.710 | 0.420 |
| 1                       | 200               | 0.45         | ReLU                | 0.776 | 0.783  | 0.711   | 0.720 | 0.702 | 0.727 | 0.715 | 0.429 |
| 1                       | 500               | 0.35         | ReLU                | 0.776 | 0.781  | 0.718   | 0.707 | 0.729 | 0.697 | 0.713 | 0.427 |
| 3                       | 300               | 0.5          | ReLU                | 0.776 | 0.784  | 0.717   | 0.728 | 0.706 | 0.736 | 0.721 | 0.442 |
| 3                       | 100               | 0.35         | ReLU                | 0.776 | 0.777  | 0.723   | 0.707 | 0.740 | 0.693 | 0.716 | 0.433 |
| 2                       | 200               | 0.5          | ReLU                | 0.776 | 0.783  | 0.708   | 0.725 | 0.692 | 0.737 | 0.714 | 0.429 |
| 2                       | 100               | 0.5          | ReLU                | 0.775 | 0.781  | 0.717   | 0.718 | 0.716 | 0.719 | 0.718 | 0.435 |
| 3                       | 100               | 0.3          | ReLU                | 0.775 | 0.779  | 0.719   | 0.708 | 0.730 | 0.699 | 0.715 | 0.429 |
| 4                       | 200               | 0.5          | ReLU                | 0.775 | 0.786  | 0.712   | 0.717 | 0.707 | 0.721 | 0.714 | 0.428 |
| 2                       | 500               | 0.45         | ReLU                | 0.775 | 0.780  | 0.714   | 0.700 | 0.728 | 0.688 | 0.708 | 0.416 |
| 2                       | 200               | 0.45         | ReLU                | 0.775 | 0.780  | 0.714   | 0.719 | 0.710 | 0.723 | 0.716 | 0.433 |
| 3                       | 400               | 0.45         | ReLU                | 0.775 | 0.780  | 0.719   | 0.717 | 0.722 | 0.715 | 0.718 | 0.437 |
| 2                       | 300               | 0.45         | ReLU                | 0.775 | 0.778  | 0.714   | 0.699 | 0.729 | 0.687 | 0.708 | 0.416 |
| 3                       | 300               | 0.45         | ReLU                | 0.775 | 0.780  | 0.717   | 0.693 | 0.743 | 0.671 | 0.707 | 0.416 |
| 2                       | 200               | 0.35         | ReLU                | 0.775 | 0.779  | 0.713   | 0.693 | 0.735 | 0.675 | 0.705 | 0.410 |
| 2                       | 300               | 0.3          | ReLU                | 0.775 | 0.774  | 0.720   | 0.689 | 0.754 | 0.659 | 0.707 | 0.415 |
| 4                       | 500               | 0.5          | ReLU                | 0.775 | 0.774  | 0.708   | 0.729 | 0.689 | 0.743 | 0.716 | 0.433 |
| 2                       | 400               | 0.35         | ReLU                | 0.775 | 0.775  | 0.720   | 0.725 | 0.715 | 0.728 | 0.721 | 0.443 |
| 2                       | 500               | 0.5          | ReLU                | 0.775 | 0.777  | 0.712   | 0.734 | 0.692 | 0.749 | 0.720 | 0.441 |

Continued on next page

Table 1 – continued from previous page

| Number of hidden layers | Number of neurons | Dropout rate | Activation function | AUC   | AUC-PR | F-score | Prec  | Rec   | Spec  | Acc   | MCC   |
|-------------------------|-------------------|--------------|---------------------|-------|--------|---------|-------|-------|-------|-------|-------|
| 5                       | 500               | 0.45         | ReLU                | 0.774 | 0.782  | 0.718   | 0.711 | 0.725 | 0.705 | 0.715 | 0.430 |
| 3                       | 500               | 0.45         | ReLU                | 0.774 | 0.775  | 0.706   | 0.717 | 0.696 | 0.725 | 0.711 | 0.421 |
| 4                       | 100               | 0.35         | ReLU                | 0.774 | 0.778  | 0.711   | 0.688 | 0.735 | 0.667 | 0.701 | 0.403 |
| 4                       | 300               | 0.5          | ReLU                | 0.774 | 0.779  | 0.718   | 0.711 | 0.727 | 0.704 | 0.715 | 0.431 |
| 4                       | 400               | 0.5          | ReLU                | 0.774 | 0.778  | 0.714   | 0.717 | 0.711 | 0.719 | 0.715 | 0.430 |
| 4                       | 100               | 0.3          | ReLU                | 0.774 | 0.782  | 0.710   | 0.710 | 0.711 | 0.710 | 0.710 | 0.421 |
| 2                       | 500               | 0.35         | ReLU                | 0.774 | 0.784  | 0.719   | 0.702 | 0.736 | 0.688 | 0.712 | 0.424 |
| 1                       | 200               | 0.4          | ReLU                | 0.774 | 0.776  | 0.713   | 0.700 | 0.727 | 0.688 | 0.707 | 0.415 |
| 5                       | 100               | 0.35         | ReLU                | 0.773 | 0.773  | 0.719   | 0.683 | 0.759 | 0.648 | 0.703 | 0.409 |
| 5                       | 400               | 0.45         | ReLU                | 0.773 | 0.777  | 0.722   | 0.709 | 0.736 | 0.698 | 0.717 | 0.434 |
| 3                       | 500               | 0.3          | ReLU                | 0.773 | 0.780  | 0.727   | 0.704 | 0.752 | 0.684 | 0.718 | 0.437 |
| 4                       | 300               | 0.45         | ReLU                | 0.773 | 0.776  | 0.714   | 0.703 | 0.726 | 0.694 | 0.710 | 0.420 |
| 4                       | 400               | 0.45         | ReLU                | 0.773 | 0.778  | 0.709   | 0.693 | 0.726 | 0.679 | 0.702 | 0.405 |
| 1                       | 400               | 0.4          | ReLU                | 0.773 | 0.777  | 0.713   | 0.696 | 0.731 | 0.680 | 0.706 | 0.412 |
| 3                       | 500               | 0.5          | ReLU                | 0.773 | 0.774  | 0.711   | 0.733 | 0.691 | 0.748 | 0.719 | 0.440 |
| 2                       | 100               | 0.35         | ReLU                | 0.773 | 0.776  | 0.717   | 0.704 | 0.730 | 0.693 | 0.712 | 0.424 |
| 3                       | 400               | 0.35         | ReLU                | 0.773 | 0.779  | 0.725   | 0.720 | 0.729 | 0.717 | 0.723 | 0.446 |
| 5                       | 300               | 0.35         | ReLU                | 0.772 | 0.773  | 0.721   | 0.715 | 0.727 | 0.710 | 0.718 | 0.437 |
| 5                       | 500               | 0.35         | ReLU                | 0.772 | 0.780  | 0.719   | 0.683 | 0.759 | 0.648 | 0.704 | 0.410 |
| 4                       | 300               | 0.4          | ReLU                | 0.772 | 0.788  | 0.713   | 0.721 | 0.706 | 0.728 | 0.717 | 0.433 |
| 1                       | 100               | 0.3          | ReLU                | 0.772 | 0.777  | 0.713   | 0.691 | 0.735 | 0.672 | 0.703 | 0.408 |
| 3                       | 200               | 0.35         | ReLU                | 0.772 | 0.773  | 0.715   | 0.699 | 0.731 | 0.685 | 0.708 | 0.416 |
| 2                       | 100               | 0.45         | ReLU                | 0.772 | 0.777  | 0.708   | 0.708 | 0.708 | 0.708 | 0.708 | 0.416 |
| 2                       | 100               | 0.3          | ReLU                | 0.771 | 0.772  | 0.715   | 0.706 | 0.724 | 0.698 | 0.711 | 0.422 |
| 3                       | 500               | 0.4          | ReLU                | 0.771 | 0.781  | 0.725   | 0.706 | 0.744 | 0.690 | 0.717 | 0.435 |
| 5                       | 200               | 0.45         | ReLU                | 0.768 | 0.771  | 0.714   | 0.658 | 0.780 | 0.595 | 0.688 | 0.382 |
| 4                       | 300               | 0.3          | ReLU                | 0.768 | 0.780  | 0.720   | 0.713 | 0.728 | 0.706 | 0.717 | 0.434 |
| 4                       | 100               | 0.45         | ReLU                | 0.767 | 0.773  | 0.710   | 0.651 | 0.781 | 0.581 | 0.681 | 0.369 |
| 5                       | 100               | 0.3          | ReLU                | 0.767 | 0.783  | 0.713   | 0.689 | 0.739 | 0.666 | 0.702 | 0.406 |
| 4                       | 100               | 0.45         | TanH                | 0.763 | 0.774  | 0.708   | 0.694 | 0.722 | 0.682 | 0.702 | 0.404 |
| 5                       | 100               | 0.4          | TanH                | 0.762 | 0.767  | 0.705   | 0.702 | 0.708 | 0.699 | 0.704 | 0.407 |
| 5                       | 200               | 0.3          | ReLU                | 0.759 | 0.784  | 0.716   | 0.698 | 0.735 | 0.682 | 0.708 | 0.417 |
| 4                       | 100               | 0.35         | TanH                | 0.759 | 0.769  | 0.704   | 0.704 | 0.704 | 0.704 | 0.704 | 0.409 |
| 4                       | 100               | 0.3          | TanH                | 0.759 | 0.764  | 0.704   | 0.706 | 0.701 | 0.709 | 0.705 | 0.409 |
| 5                       | 100               | 0.35         | TanH                | 0.759 | 0.771  | 0.710   | 0.700 | 0.721 | 0.691 | 0.706 | 0.412 |
| 5                       | 100               | 0.45         | ReLU                | 0.759 | 0.738  | 0.714   | 0.615 | 0.850 | 0.468 | 0.659 | 0.345 |
| 3                       | 100               | 0.35         | TanH                | 0.759 | 0.763  | 0.707   | 0.695 | 0.718 | 0.685 | 0.702 | 0.404 |
| 5                       | 300               | 0.5          | TanH                | 0.758 | 0.762  | 0.705   | 0.685 | 0.727 | 0.665 | 0.696 | 0.393 |
| 3                       | 100               | 0.4          | TanH                | 0.758 | 0.765  | 0.702   | 0.694 | 0.710 | 0.687 | 0.698 | 0.397 |
| 5                       | 200               | 0.4          | TanH                | 0.757 | 0.760  | 0.702   | 0.693 | 0.711 | 0.685 | 0.698 | 0.396 |
| 4                       | 400               | 0.4          | ReLU                | 0.757 | 0.780  | 0.720   | 0.691 | 0.750 | 0.665 | 0.708 | 0.417 |

Continued on next page

Table 1 – continued from previous page

| Number of hidden layers | Number of neurons | Dropout rate | Activation function | AUC   | AUC-PR | F-score | Prec  | Rec   | Spec  | Acc   | MCC   |
|-------------------------|-------------------|--------------|---------------------|-------|--------|---------|-------|-------|-------|-------|-------|
| 5                       | 100               | 0.45         | TanH                | 0.757 | 0.767  | 0.694   | 0.696 | 0.692 | 0.698 | 0.695 | 0.390 |
| 5                       | 200               | 0.45         | TanH                | 0.757 | 0.771  | 0.708   | 0.700 | 0.715 | 0.694 | 0.705 | 0.409 |
| 4                       | 200               | 0.35         | TanH                | 0.757 | 0.764  | 0.708   | 0.698 | 0.719 | 0.688 | 0.704 | 0.407 |
| 5                       | 200               | 0.5          | ReLU                | 0.756 | 0.744  | 0.707   | 0.622 | 0.818 | 0.503 | 0.661 | 0.339 |
| 2                       | 100               | 0.35         | TanH                | 0.756 | 0.755  | 0.707   | 0.701 | 0.714 | 0.695 | 0.704 | 0.409 |
| 4                       | 200               | 0.45         | TanH                | 0.756 | 0.756  | 0.708   | 0.698 | 0.719 | 0.689 | 0.704 | 0.408 |
| 1                       | 100               | 0.45         | TanH                | 0.756 | 0.759  | 0.694   | 0.702 | 0.687 | 0.708 | 0.697 | 0.395 |
| 2                       | 100               | 0.45         | TanH                | 0.756 | 0.757  | 0.705   | 0.695 | 0.716 | 0.685 | 0.701 | 0.401 |
| 4                       | 100               | 0.4          | TanH                | 0.756 | 0.768  | 0.704   | 0.697 | 0.711 | 0.690 | 0.701 | 0.402 |
| 3                       | 100               | 0.45         | TanH                | 0.756 | 0.763  | 0.704   | 0.699 | 0.710 | 0.694 | 0.702 | 0.403 |
| 4                       | 200               | 0.4          | TanH                | 0.755 | 0.760  | 0.703   | 0.690 | 0.716 | 0.678 | 0.697 | 0.394 |
| 4                       | 100               | 0.5          | TanH                | 0.755 | 0.761  | 0.699   | 0.682 | 0.716 | 0.667 | 0.691 | 0.383 |
| 1                       | 100               | 0.5          | TanH                | 0.755 | 0.759  | 0.702   | 0.687 | 0.718 | 0.673 | 0.696 | 0.392 |
| 3                       | 200               | 0.5          | TanH                | 0.755 | 0.762  | 0.697   | 0.678 | 0.717 | 0.659 | 0.688 | 0.377 |
| 5                       | 500               | 0.5          | TanH                | 0.754 | 0.756  | 0.707   | 0.693 | 0.721 | 0.680 | 0.701 | 0.402 |
| 1                       | 200               | 0.3          | TanH                | 0.754 | 0.749  | 0.705   | 0.700 | 0.709 | 0.696 | 0.703 | 0.405 |
| 5                       | 200               | 0.35         | TanH                | 0.754 | 0.759  | 0.709   | 0.696 | 0.723 | 0.684 | 0.703 | 0.406 |
| 5                       | 200               | 0.4          | ReLU                | 0.754 | 0.780  | 0.705   | 0.729 | 0.683 | 0.746 | 0.715 | 0.430 |
| 1                       | 100               | 0.35         | TanH                | 0.754 | 0.754  | 0.706   | 0.699 | 0.712 | 0.693 | 0.703 | 0.406 |
| 4                       | 400               | 0.3          | ReLU                | 0.754 | 0.773  | 0.713   | 0.695 | 0.731 | 0.680 | 0.705 | 0.411 |
| 2                       | 100               | 0.4          | TanH                | 0.754 | 0.756  | 0.706   | 0.696 | 0.717 | 0.687 | 0.702 | 0.404 |
| 2                       | 200               | 0.45         | TanH                | 0.754 | 0.754  | 0.701   | 0.695 | 0.706 | 0.691 | 0.699 | 0.397 |
| 1                       | 100               | 0.4          | TanH                | 0.754 | 0.754  | 0.698   | 0.692 | 0.704 | 0.687 | 0.696 | 0.391 |
| 3                       | 100               | 0.5          | TanH                | 0.754 | 0.761  | 0.699   | 0.678 | 0.721 | 0.657 | 0.689 | 0.379 |
| 1                       | 500               | 0.35         | TanH                | 0.753 | 0.750  | 0.708   | 0.696 | 0.721 | 0.685 | 0.703 | 0.406 |
| 1                       | 200               | 0.45         | TanH                | 0.753 | 0.744  | 0.704   | 0.694 | 0.714 | 0.685 | 0.699 | 0.399 |
| 4                       | 100               | 0.5          | ReLU                | 0.753 | 0.738  | 0.702   | 0.579 | 0.892 | 0.351 | 0.622 | 0.289 |
| 1                       | 400               | 0.3          | TanH                | 0.753 | 0.747  | 0.700   | 0.711 | 0.690 | 0.719 | 0.705 | 0.409 |
| 5                       | 200               | 0.3          | TanH                | 0.753 | 0.746  | 0.708   | 0.699 | 0.716 | 0.691 | 0.704 | 0.408 |
| 4                       | 200               | 0.5          | TanH                | 0.753 | 0.752  | 0.701   | 0.675 | 0.729 | 0.649 | 0.689 | 0.379 |
| 4                       | 300               | 0.35         | TanH                | 0.753 | 0.744  | 0.705   | 0.688 | 0.723 | 0.672 | 0.697 | 0.395 |
| 1                       | 500               | 0.3          | TanH                | 0.753 | 0.748  | 0.705   | 0.704 | 0.705 | 0.704 | 0.705 | 0.409 |
| 3                       | 300               | 0.5          | TanH                | 0.752 | 0.757  | 0.704   | 0.685 | 0.723 | 0.668 | 0.696 | 0.392 |
| 2                       | 100               | 0.3          | TanH                | 0.752 | 0.754  | 0.704   | 0.701 | 0.706 | 0.699 | 0.703 | 0.405 |
| 2                       | 300               | 0.35         | TanH                | 0.752 | 0.750  | 0.710   | 0.704 | 0.716 | 0.699 | 0.708 | 0.415 |
| 2                       | 100               | 0.5          | TanH                | 0.752 | 0.760  | 0.694   | 0.672 | 0.717 | 0.649 | 0.683 | 0.367 |
| 5                       | 500               | 0.45         | TanH                | 0.752 | 0.744  | 0.708   | 0.699 | 0.717 | 0.691 | 0.704 | 0.408 |
| 1                       | 100               | 0.3          | TanH                | 0.752 | 0.747  | 0.701   | 0.694 | 0.709 | 0.687 | 0.698 | 0.396 |
| 1                       | 300               | 0.35         | TanH                | 0.752 | 0.747  | 0.698   | 0.701 | 0.695 | 0.704 | 0.699 | 0.398 |
| 5                       | 100               | 0.5          | TanH                | 0.752 | 0.760  | 0.699   | 0.678 | 0.722 | 0.657 | 0.689 | 0.379 |
| 1                       | 500               | 0.4          | TanH                | 0.752 | 0.748  | 0.706   | 0.697 | 0.716 | 0.689 | 0.702 | 0.405 |

Continued on next page

Table 1 – continued from previous page

| Number of hidden layers | Number of neurons | Dropout rate | Activation function | AUC   | AUC-PR | F-score | Prec  | Rec   | Spec  | Acc   | MCC   |
|-------------------------|-------------------|--------------|---------------------|-------|--------|---------|-------|-------|-------|-------|-------|
| 2                       | 300               | 0.45         | TanH                | 0.752 | 0.746  | 0.707   | 0.698 | 0.717 | 0.689 | 0.703 | 0.406 |
| 3                       | 300               | 0.45         | TanH                | 0.752 | 0.749  | 0.698   | 0.702 | 0.694 | 0.706 | 0.700 | 0.400 |
| 5                       | 200               | 0.5          | TanH                | 0.751 | 0.756  | 0.697   | 0.678 | 0.716 | 0.660 | 0.688 | 0.377 |
| 3                       | 200               | 0.45         | TanH                | 0.751 | 0.754  | 0.701   | 0.704 | 0.698 | 0.706 | 0.702 | 0.404 |
| 1                       | 400               | 0.35         | TanH                | 0.751 | 0.745  | 0.704   | 0.697 | 0.711 | 0.691 | 0.701 | 0.403 |
| 1                       | 200               | 0.35         | TanH                | 0.751 | 0.747  | 0.696   | 0.702 | 0.689 | 0.708 | 0.699 | 0.397 |
| 5                       | 300               | 0.45         | TanH                | 0.751 | 0.752  | 0.699   | 0.683 | 0.716 | 0.668 | 0.692 | 0.384 |
| 1                       | 300               | 0.3          | TanH                | 0.751 | 0.744  | 0.701   | 0.702 | 0.701 | 0.702 | 0.701 | 0.403 |
| 2                       | 300               | 0.5          | TanH                | 0.751 | 0.751  | 0.704   | 0.696 | 0.711 | 0.690 | 0.700 | 0.401 |
| 2                       | 200               | 0.35         | TanH                | 0.751 | 0.748  | 0.697   | 0.700 | 0.695 | 0.702 | 0.699 | 0.397 |
| 1                       | 400               | 0.4          | TanH                | 0.751 | 0.747  | 0.691   | 0.705 | 0.677 | 0.716 | 0.697 | 0.393 |
| 5                       | 400               | 0.35         | TanH                | 0.750 | 0.745  | 0.709   | 0.701 | 0.718 | 0.693 | 0.706 | 0.411 |
| 1                       | 500               | 0.5          | TanH                | 0.750 | 0.745  | 0.701   | 0.700 | 0.703 | 0.698 | 0.701 | 0.401 |
| 2                       | 200               | 0.5          | TanH                | 0.750 | 0.753  | 0.697   | 0.674 | 0.722 | 0.651 | 0.687 | 0.374 |
| 1                       | 300               | 0.5          | TanH                | 0.750 | 0.748  | 0.697   | 0.682 | 0.713 | 0.668 | 0.691 | 0.382 |
| 2                       | 300               | 0.4          | TanH                | 0.750 | 0.749  | 0.705   | 0.703 | 0.706 | 0.701 | 0.704 | 0.408 |
| 4                       | 300               | 0.45         | TanH                | 0.750 | 0.757  | 0.706   | 0.692 | 0.720 | 0.680 | 0.700 | 0.400 |
| 1                       | 400               | 0.45         | TanH                | 0.750 | 0.745  | 0.702   | 0.693 | 0.711 | 0.684 | 0.698 | 0.396 |
| 2                       | 200               | 0.4          | TanH                | 0.750 | 0.748  | 0.702   | 0.695 | 0.709 | 0.688 | 0.699 | 0.397 |
| 3                       | 300               | 0.4          | TanH                | 0.750 | 0.746  | 0.704   | 0.690 | 0.717 | 0.678 | 0.698 | 0.396 |
| 2                       | 200               | 0.3          | TanH                | 0.749 | 0.746  | 0.696   | 0.706 | 0.687 | 0.713 | 0.700 | 0.400 |
| 5                       | 100               | 0.3          | TanH                | 0.749 | 0.754  | 0.701   | 0.689 | 0.713 | 0.679 | 0.696 | 0.392 |
| 3                       | 500               | 0.5          | TanH                | 0.749 | 0.743  | 0.709   | 0.689 | 0.730 | 0.671 | 0.700 | 0.402 |
| 3                       | 100               | 0.3          | TanH                | 0.748 | 0.750  | 0.704   | 0.696 | 0.712 | 0.688 | 0.700 | 0.401 |
| 2                       | 400               | 0.5          | TanH                | 0.748 | 0.749  | 0.696   | 0.678 | 0.714 | 0.661 | 0.688 | 0.376 |
| 2                       | 400               | 0.35         | TanH                | 0.748 | 0.739  | 0.707   | 0.701 | 0.714 | 0.696 | 0.705 | 0.410 |
| 4                       | 500               | 0.5          | TanH                | 0.748 | 0.746  | 0.702   | 0.669 | 0.738 | 0.636 | 0.687 | 0.375 |
| 1                       | 200               | 0.4          | TanH                | 0.748 | 0.742  | 0.696   | 0.703 | 0.690 | 0.708 | 0.699 | 0.398 |
| 5                       | 300               | 0.4          | TanH                | 0.748 | 0.745  | 0.706   | 0.699 | 0.714 | 0.692 | 0.703 | 0.406 |
| 1                       | 300               | 0.4          | TanH                | 0.748 | 0.743  | 0.693   | 0.703 | 0.684 | 0.711 | 0.697 | 0.394 |
| 1                       | 400               | 0.5          | TanH                | 0.748 | 0.747  | 0.699   | 0.680 | 0.719 | 0.662 | 0.691 | 0.382 |
| 1                       | 200               | 0.5          | TanH                | 0.748 | 0.748  | 0.695   | 0.682 | 0.709 | 0.669 | 0.689 | 0.378 |
| 3                       | 200               | 0.4          | TanH                | 0.747 | 0.745  | 0.697   | 0.693 | 0.701 | 0.689 | 0.695 | 0.391 |
| 5                       | 300               | 0.35         | TanH                | 0.747 | 0.739  | 0.705   | 0.696 | 0.713 | 0.689 | 0.701 | 0.402 |
| 2                       | 500               | 0.4          | TanH                | 0.747 | 0.738  | 0.705   | 0.698 | 0.712 | 0.692 | 0.702 | 0.404 |
| 1                       | 500               | 0.45         | TanH                | 0.747 | 0.743  | 0.695   | 0.701 | 0.690 | 0.705 | 0.697 | 0.395 |
| 5                       | 400               | 0.4          | TanH                | 0.747 | 0.745  | 0.696   | 0.704 | 0.689 | 0.710 | 0.699 | 0.399 |
| 4                       | 500               | 0.45         | TanH                | 0.747 | 0.731  | 0.714   | 0.692 | 0.736 | 0.672 | 0.704 | 0.409 |
| 5                       | 400               | 0.45         | TanH                | 0.747 | 0.739  | 0.710   | 0.695 | 0.724 | 0.682 | 0.703 | 0.407 |
| 1                       | 300               | 0.45         | TanH                | 0.747 | 0.743  | 0.692   | 0.699 | 0.684 | 0.706 | 0.695 | 0.390 |
| 4                       | 400               | 0.5          | TanH                | 0.747 | 0.747  | 0.704   | 0.682 | 0.728 | 0.660 | 0.694 | 0.389 |

Continued on next page

Table 1 – continued from previous page

| Number of hidden layers | Number of neurons | Dropout rate | Activation function | AUC   | AUC-PR | F-score | Prec  | Rec   | Spec  | Acc   | MCC   |
|-------------------------|-------------------|--------------|---------------------|-------|--------|---------|-------|-------|-------|-------|-------|
| 4                       | 300               | 0.4          | TanH                | 0.747 | 0.747  | 0.705   | 0.688 | 0.723 | 0.672 | 0.698 | 0.396 |
| 3                       | 200               | 0.3          | TanH                | 0.747 | 0.742  | 0.707   | 0.696 | 0.718 | 0.686 | 0.702 | 0.404 |
| 2                       | 500               | 0.5          | TanH                | 0.747 | 0.743  | 0.700   | 0.681 | 0.720 | 0.662 | 0.691 | 0.384 |
| 5                       | 300               | 0.3          | ReLU                | 0.747 | 0.778  | 0.702   | 0.709 | 0.695 | 0.714 | 0.705 | 0.409 |
| 2                       | 400               | 0.4          | TanH                | 0.747 | 0.738  | 0.700   | 0.705 | 0.696 | 0.708 | 0.702 | 0.404 |
| 2                       | 400               | 0.45         | TanH                | 0.746 | 0.738  | 0.709   | 0.705 | 0.713 | 0.701 | 0.707 | 0.414 |
| 5                       | 400               | 0.5          | TanH                | 0.746 | 0.738  | 0.700   | 0.676 | 0.725 | 0.653 | 0.689 | 0.379 |
| 2                       | 500               | 0.45         | TanH                | 0.746 | 0.746  | 0.690   | 0.696 | 0.684 | 0.702 | 0.693 | 0.386 |
| 4                       | 300               | 0.5          | TanH                | 0.745 | 0.748  | 0.700   | 0.675 | 0.727 | 0.650 | 0.688 | 0.378 |
| 4                       | 200               | 0.3          | TanH                | 0.745 | 0.739  | 0.696   | 0.699 | 0.693 | 0.702 | 0.698 | 0.395 |
| 3                       | 400               | 0.4          | TanH                | 0.745 | 0.737  | 0.704   | 0.699 | 0.708 | 0.695 | 0.702 | 0.403 |
| 3                       | 300               | 0.35         | TanH                | 0.745 | 0.744  | 0.700   | 0.707 | 0.693 | 0.712 | 0.703 | 0.405 |
| 4                       | 400               | 0.3          | TanH                | 0.745 | 0.733  | 0.710   | 0.690 | 0.732 | 0.671 | 0.701 | 0.403 |
| 3                       | 400               | 0.45         | TanH                | 0.744 | 0.742  | 0.706   | 0.695 | 0.718 | 0.684 | 0.701 | 0.403 |
| 4                       | 400               | 0.45         | TanH                | 0.744 | 0.740  | 0.707   | 0.694 | 0.720 | 0.682 | 0.701 | 0.402 |
| 5                       | 100               | 0.5          | ReLU                | 0.744 | 0.720  | 0.701   | 0.592 | 0.859 | 0.407 | 0.633 | 0.298 |
| 4                       | 500               | 0.3          | TanH                | 0.744 | 0.733  | 0.709   | 0.695 | 0.723 | 0.682 | 0.703 | 0.406 |
| 5                       | 300               | 0.3          | TanH                | 0.744 | 0.739  | 0.707   | 0.696 | 0.717 | 0.687 | 0.702 | 0.405 |
| 3                       | 200               | 0.35         | TanH                | 0.744 | 0.742  | 0.692   | 0.697 | 0.688 | 0.701 | 0.694 | 0.389 |
| 2                       | 500               | 0.35         | TanH                | 0.743 | 0.734  | 0.706   | 0.692 | 0.720 | 0.680 | 0.700 | 0.400 |
| 3                       | 400               | 0.5          | TanH                | 0.743 | 0.743  | 0.699   | 0.676 | 0.722 | 0.654 | 0.688 | 0.377 |
| 4                       | 400               | 0.35         | TanH                | 0.743 | 0.739  | 0.703   | 0.697 | 0.709 | 0.692 | 0.700 | 0.401 |
| 2                       | 400               | 0.3          | TanH                | 0.743 | 0.735  | 0.698   | 0.709 | 0.687 | 0.718 | 0.703 | 0.406 |
| 4                       | 400               | 0.4          | TanH                | 0.743 | 0.732  | 0.710   | 0.704 | 0.715 | 0.700 | 0.707 | 0.415 |
| 3                       | 500               | 0.4          | TanH                | 0.743 | 0.740  | 0.704   | 0.696 | 0.712 | 0.689 | 0.700 | 0.401 |
| 5                       | 500               | 0.35         | TanH                | 0.743 | 0.724  | 0.707   | 0.706 | 0.709 | 0.705 | 0.707 | 0.414 |
| 4                       | 500               | 0.4          | TanH                | 0.742 | 0.731  | 0.707   | 0.694 | 0.719 | 0.684 | 0.701 | 0.403 |
| 3                       | 500               | 0.3          | TanH                | 0.742 | 0.728  | 0.704   | 0.698 | 0.710 | 0.693 | 0.701 | 0.402 |
| 3                       | 400               | 0.35         | TanH                | 0.742 | 0.734  | 0.699   | 0.708 | 0.690 | 0.716 | 0.703 | 0.406 |
| 2                       | 500               | 0.3          | TanH                | 0.742 | 0.729  | 0.704   | 0.689 | 0.720 | 0.674 | 0.697 | 0.395 |
| 5                       | 500               | 0.3          | TanH                | 0.741 | 0.727  | 0.705   | 0.698 | 0.711 | 0.692 | 0.702 | 0.403 |
| 3                       | 500               | 0.35         | TanH                | 0.740 | 0.730  | 0.706   | 0.694 | 0.718 | 0.684 | 0.701 | 0.401 |
| 3                       | 300               | 0.3          | TanH                | 0.740 | 0.728  | 0.702   | 0.695 | 0.710 | 0.688 | 0.699 | 0.398 |
| 4                       | 500               | 0.35         | TanH                | 0.739 | 0.732  | 0.701   | 0.692 | 0.711 | 0.684 | 0.697 | 0.395 |
| 4                       | 300               | 0.3          | TanH                | 0.739 | 0.726  | 0.691   | 0.703 | 0.679 | 0.713 | 0.696 | 0.392 |
| 3                       | 500               | 0.45         | TanH                | 0.739 | 0.741  | 0.691   | 0.704 | 0.679 | 0.715 | 0.697 | 0.394 |
| 2                       | 300               | 0.3          | TanH                | 0.738 | 0.727  | 0.697   | 0.703 | 0.691 | 0.707 | 0.699 | 0.398 |
| 5                       | 400               | 0.3          | TanH                | 0.736 | 0.721  | 0.709   | 0.700 | 0.717 | 0.692 | 0.705 | 0.410 |
| 4                       | 500               | 0.4          | ReLU                | 0.736 | 0.764  | 0.703   | 0.696 | 0.709 | 0.690 | 0.700 | 0.399 |
| 3                       | 400               | 0.3          | TanH                | 0.736 | 0.719  | 0.705   | 0.697 | 0.713 | 0.690 | 0.702 | 0.403 |
| 5                       | 500               | 0.4          | TanH                | 0.735 | 0.713  | 0.690   | 0.706 | 0.674 | 0.719 | 0.696 | 0.393 |

Continued on next page

Table 1 – continued from previous page

| Number<br>of hidden<br>layers | Number<br>of<br>neurons | Dropout<br>rate | Activation<br>function | AUC   | AUC-PR | F-score | Prec  | Rec   | Spec  | Acc   | MCC   |
|-------------------------------|-------------------------|-----------------|------------------------|-------|--------|---------|-------|-------|-------|-------|-------|
| 4                             | 500                     | 0.3             | ReLU                   | 0.729 | 0.774  | 0.708   | 0.683 | 0.734 | 0.660 | 0.697 | 0.395 |
| 5                             | 400                     | 0.3             | ReLU                   | 0.725 | 0.776  | 0.698   | 0.708 | 0.689 | 0.716 | 0.702 | 0.404 |
| 5                             | 300                     | 0.4             | ReLU                   | 0.724 | 0.781  | 0.706   | 0.693 | 0.720 | 0.681 | 0.700 | 0.401 |
| 5                             | 500                     | 0.4             | ReLU                   | 0.704 | 0.767  | 0.648   | 0.764 | 0.563 | 0.826 | 0.694 | 0.403 |
| 5                             | 400                     | 0.4             | ReLU                   | 0.697 | 0.770  | 0.696   | 0.685 | 0.706 | 0.676 | 0.691 | 0.382 |
| 5                             | 500                     | 0.3             | ReLU                   | 0.696 | 0.771  | 0.696   | 0.688 | 0.704 | 0.681 | 0.692 | 0.385 |

Table 1: Nested cross-validation results of the trained deep neural network models with their hyperparameters settings



**Table 2 summarizes the SNF-NN predicted drug-disease interactions**

| <b>Drug name</b>                             | <b>DrugBank ID</b> | <b>Disease name</b>                  | <b>Disease CUI</b> |
|----------------------------------------------|--------------------|--------------------------------------|--------------------|
| Etanercept                                   | DB00005            | Heartburn                            | C0018834           |
| Peginterferon alfa-2a                        | DB00008            | Enterobacter Pneumonia               | C1096258           |
| Goserelin                                    | DB00014            | Allergic Rhinitis (Disorder)         | C2607914           |
| Salmon Calcitonin                            | DB00017            | Salmonella Sepsis                    | C0152486           |
| Gramicidin D                                 | DB00027            | Nosocomial Pneumonia                 | C0949083           |
| Gramicidin D                                 | DB00027            | Syphilis                             | C0039128           |
| Gramicidin D                                 | DB00027            | Follicular Thyroid Carcinoma         | C0206682           |
| Gramicidin D                                 | DB00027            | Blastomycosis                        | C0005716           |
| Gramicidin D                                 | DB00027            | Infective Otitis Media               | C0729586           |
| Insulin Human                                | DB00030            | Allergic Conjunctivitis              | C0009766           |
| Desmopressin                                 | DB00035            | Otitis Externa                       | C0029878           |
| Coagulation factor VIIa<br>Recombinant Human | DB00036            | Vitamin B 12 Deficiency              | C0042847           |
| Omalizumab                                   | DB00043            | Typhus, Epidemic Louse-Borne         | C0041473           |
| Somatropin recombinant                       | DB00052            | Schizophrenia                        | C0036341           |
| Somatropin recombinant                       | DB00052            | Chancroids                           | C0007947           |
| Somatropin recombinant                       | DB00052            | Atrophy of Vulva                     | C0156393           |
| Trastuzumab                                  | DB00072            | Tetanus                              | C0039614           |
| Daclizumab                                   | DB00111            | Leukemia, Myelocytic, Acute          | C0023467           |
| Xanthophyll                                  | DB00137            | Osteitis Deformans                   | C0029401           |
| Glycine                                      | DB00145            | Malignant Neoplasm of Lung           | C0242379           |
| Thiamine                                     | DB00152            | Exanthema                            | C0015230           |
| Thiamine                                     | DB00152            | Legionella Pneumophila Pneumonia     | C0857846           |
| Thiamine                                     | DB00152            | Pneumococcal Infections              | C0032269           |
| Cholecalciferol                              | DB00169            | Atrophic Vaginitis                   | C0221392           |
| Cholecalciferol                              | DB00169            | Adrenal Cortical Hypofunction        | C0405580           |
| Cholecalciferol                              | DB00169            | Urinary Retention                    | C0080274           |
| Pravastatin                                  | DB00175            | Conjunctivitis, Vernal               | C0009773           |
| Esmolol                                      | DB00187            | Decompensated Cardiac Failure        | C0581377           |
| Bortezomib                                   | DB00188            | Nasal Congestion (Finding)           | C0027424           |
| Carbidopa                                    | DB00190            | Haemophilus Parainfluenzae Pneumonia | C0877633           |
| Phentermine                                  | DB00191            | Enterobacter Pneumonia               | C1096258           |
| Phentermine                                  | DB00191            | Tinea Capitis                        | C0040250           |
| Phentermine                                  | DB00191            | Q Fever Endocarditis                 | C0340354           |
| Tramadol                                     | DB00193            | Acute Gonococcal Cervicitis          | C0153195           |
| Tramadol                                     | DB00193            | Cardiac Arrest                       | C0018790           |
| Vidarabine                                   | DB00194            | Tendinitis                           | C0039503           |
| Fluconazole                                  | DB00196            | Onychomycosis of Toenails            | C1274470           |
| Fluconazole                                  | DB00196            | Cluster Headache                     | C0009088           |
| Fluconazole                                  | DB00196            | Tinea Versicolor                     | C0040262           |
| Fluconazole                                  | DB00196            | Diaper Rash                          | C0011974           |
| Caffeine                                     | DB00201            | Anthrax Disease                      | C0003175           |

Continued on next page

Table 2 – continued from previous page

| Drug name           | DrugBank ID | Disease name                                                           | Disease CUI |
|---------------------|-------------|------------------------------------------------------------------------|-------------|
| Caffeine            | DB00201     | Muscle Spasticity of Spinal Origin                                     | C1562430    |
| Azithromycin        | DB00207     | Malignant Lymphoma, Lymphocytic, Intermediate Differentiation, Diffuse | C0334634    |
| Azithromycin        | DB00207     | Escherichia Coli Septicemia                                            | C0276088    |
| Azithromycin        | DB00207     | Diabetic Foot Infection                                                | C0744130    |
| Moxifloxacin        | DB00218     | Chronic Pain                                                           | C0150055    |
| Moxifloxacin        | DB00218     | Epilepsies, Partial                                                    | C0014547    |
| Moxifloxacin        | DB00218     | Pruritus Ani                                                           | C0033775    |
| Moxifloxacin        | DB00218     | Poisoning By Pyrimethamine                                             | C0274478    |
| Methyclothiazide    | DB00232     | Angina Pectoris                                                        | C0002962    |
| Aminosalicylic Acid | DB00233     | Erythema Nodosum Leprosum                                              | C0343467    |
| Aminosalicylic Acid | DB00233     | Nausea and Vomiting                                                    | C0027498    |
| Mesalazine          | DB00244     | Furunculosis                                                           | C0016867    |
| Clotrimazole        | DB00257     | Blast Phase                                                            | C0005699    |
| Sulfanilamide       | DB00259     | Pneumococcal Infections                                                | C0032269    |
| Cycloserine         | DB00260     | Streptococcal Tonsillitis                                              | C0275804    |
| Sulfisoxazole       | DB00263     | Keratoconjunctivitis                                                   | C0022573    |
| Sulfisoxazole       | DB00263     | Streptococcus Pyogenes Infection                                       | C0554628    |
| Crotamiton          | DB00265     | Chlamydial Cervicitis                                                  | C0341834    |
| Crotamiton          | DB00265     | Degenerative Polyarthritis                                             | C0029408    |
| Crotamiton          | DB00265     | Bursitis                                                               | C0006444    |
| Crotamiton          | DB00265     | Herpes Zoster Keratitis                                                | C1275687    |
| Crotamiton          | DB00265     | Congenital Hemolytic Uremic Syndrome                                   | C2919522    |
| Topiramate          | DB00273     | Sneezing                                                               | C0037383    |
| Topiramate          | DB00273     | Granuloma Annulare                                                     | C0085074    |
| Topiramate          | DB00273     | Staphylococcus Aureus Infection                                        | C1318973    |
| Topiramate          | DB00273     | Tinea Corporis (Disorder)                                              | C0040252    |
| Topiramate          | DB00273     | Rosacea                                                                | C0035854    |
| Cefmetazole         | DB00274     | Muscle Spasticity of Spinal Origin                                     | C1562430    |
| Clemastine          | DB00283     | Psychotic Disorders                                                    | C0033975    |
| Penciclovir         | DB00299     | Urinary Tract Infection Enterococcus                                   | C0749958    |
| Penciclovir         | DB00299     | Fusariosis                                                             | C0276758    |
| Tenofovir           | DB00300     | Chronic Small Plaque Psoriasis                                         | C0406317    |
| Tranexamic Acid     | DB00302     | Synovitis                                                              | C0039103    |
| Ertapenem           | DB00303     | Anemia of Prematurity                                                  | C0158996    |
| Ertapenem           | DB00303     | Septicemia Due to Bacteroides                                          | C0276064    |
| Chlorthalidone      | DB00310     | Haemophilus Parainfluenzae Pneumonia                                   | C0877633    |
| Chlorthalidone      | DB00310     | Pneumonia, Bacterial                                                   | C0004626    |
| Chlorthalidone      | DB00310     | Rickettsia Infections                                                  | C0035585    |
| Capreomycin         | DB00314     | Haemophilus Influenzae Type B Infection                                | C2028293    |
| Codeine             | DB00318     | Epicondylitis                                                          | C0014488    |
| Piperacillin        | DB00319     | Carbamoyl-Phosphate Synthase I Deficiency Disease                      | C0751753    |
| Floxuridine         | DB00322     | Cutaneous Candidiasis                                                  | C0006846    |

Continued on next page

Table 2 – continued from previous page

| Drug name                   | DrugBank ID | Disease name                               | Disease CUI |
|-----------------------------|-------------|--------------------------------------------|-------------|
| Nitroprusside               | DB00325     | Acute Lymphocytic Leukemia                 | C0023449    |
| Indomethacin                | DB00328     | Gingivostomatitis                          | C0149704    |
| Indomethacin                | DB00328     | Contact Dermatitis                         | C0011616    |
| Ipratropium bromide         | DB00332     | Acute Bacterial Sinusitis                  | C0275556    |
| Nitrofurantoin              | DB00336     | Chemotherapy-Induced Nausea and Vomiting   | C0401160    |
| Cetirizine                  | DB00341     | Impetigo                                   | C0021099    |
| Minoxidil                   | DB00350     | Hypoparathyroidism                         | C0020626    |
| Aztreonam                   | DB00355     | Nosocomial Pneumonia                       | C0949083    |
| Aztreonam                   | DB00355     | Exacerbation of Asthma                     | C0349790    |
| Aztreonam                   | DB00355     | Severe Pain                                | C0278140    |
| Aztreonam                   | DB00355     | Chemotherapy-Induced Nausea and Vomiting   | C0401160    |
| Aztreonam                   | DB00355     | Acute Bacterial Bronchitis                 | C0339933    |
| Aztreonam                   | DB00355     | Sinusitis                                  | C0037199    |
| Doxylamine                  | DB00366     | Hypotension                                | C0020649    |
| Doxylamine                  | DB00366     | Complex Dyslipidemia                       | C3875286    |
| Levonorgestrel              | DB00367     | Onychomycosis                              | C0040261    |
| Norepinephrine              | DB00368     | Escherichia Coli Urinary Tract Infection   | C0577708    |
| Colestipol                  | DB00375     | Rhinitis                                   | C0035455    |
| Colestipol                  | DB00375     | Fever                                      | C0015967    |
| Carbimazole                 | DB00389     | Scurfiness of Scalp                        | C0423775    |
| Digoxin                     | DB00390     | Enterobacter Pneumonia                     | C1096258    |
| Digoxin                     | DB00390     | Simple Partial Seizures                    | C0234974    |
| Beclomethasone dipropionate | DB00394     | Dermatologic Disorders                     | C0037274    |
| Beclomethasone dipropionate | DB00394     | Tinea Versicolor                           | C0040262    |
| Progesterone                | DB00396     | Shigella Infections                        | C0013371    |
| Griseofulvin                | DB00400     | Chlamydial Pneumonia                       | C0339959    |
| Griseofulvin                | DB00400     | Genitourinary Tract Infection              | C1279247    |
| Dexbrompheniramine          | DB00405     | Pharyngitis                                | C0031350    |
| Ampicillin                  | DB00415     | Hypotension                                | C0020649    |
| Zolpidem                    | DB00425     | Lupus Erythematosus, Discoid               | C0024138    |
| Zolpidem                    | DB00425     | Infection Due to Pseudomonas Aeruginosa    | C0276075    |
| Carboprost Tromethamine     | DB00429     | Plague                                     | C0032064    |
| Cyproheptadine              | DB00434     | Nocardia Infections                        | C0028242    |
| Allopurinol                 | DB00437     | Psoriasis                                  | C0033860    |
| Ceftazidime                 | DB00438     | Vitamin D-Dependent Rickets                | C0221468    |
| Ceftazidime                 | DB00438     | Kaposi Sarcoma                             | C0036220    |
| Ceftazidime                 | DB00438     | Fever                                      | C0015967    |
| Trimethoprim                | DB00440     | Familial Hypercholesterolemia - Homozygous | C0342881    |
| Betamethasone               | DB00443     | Meningitis                                 | C0025289    |
| Betamethasone               | DB00443     | Mycoplasma Pneumonia                       | C0032302    |
| Betamethasone               | DB00443     | Metrorrhagia                               | C0025874    |

Continued on next page

Table 2 – continued from previous page

| Drug name        | DrugBank ID | Disease name                                                           | Disease CUI |
|------------------|-------------|------------------------------------------------------------------------|-------------|
| Betamethasone    | DB00443     | Postherpetic Neuralgia                                                 | C0032768    |
| Betamethasone    | DB00443     | Arthropathy Associated With Infection                                  | C0157749    |
| Betamethasone    | DB00443     | Poisoning By Sulfadiazine                                              | C0274462    |
| Pethidine        | DB00454     | Diarrhea                                                               | C0011991    |
| Loratadine       | DB00455     | Salmonella Sepsis                                                      | C0152486    |
| Cefalotin        | DB00456     | Renal Cell Carcinoma                                                   | C0007134    |
| Cefalotin        | DB00456     | Glaucoma, Open-Angle                                                   | C0017612    |
| Cefalotin        | DB00456     | Pediculus Capitis Infestation                                          | C0030757    |
| Cefalotin        | DB00456     | Gonococcal Infection Disseminated                                      | C0744451    |
| Cefalotin        | DB00456     | Anemia of Prematurity                                                  | C0158996    |
| Cefalotin        | DB00456     | Urgency of Micturition                                                 | C0085606    |
| Chlordiazepoxide | DB00475     | Lennox-Gastaut Syndrome                                                | C0238111    |
| Duloxetine       | DB00476     | Multiple Sclerosis                                                     | C0026769    |
| Chlorpromazine   | DB00477     | Malignant Essential Hypertension                                       | C0024588    |
| Amikacin         | DB00479     | Haemophilus Influenzae Type B Infection                                | C2028293    |
| Amikacin         | DB00479     | Sore Throat                                                            | C0242429    |
| Celecoxib        | DB00482     | Erysipelas                                                             | C0014733    |
| Dicloxacillin    | DB00485     | Malignant Lymphoma, Lymphocytic, Intermediate Differentiation, Diffuse | C0334634    |
| Cefotaxime       | DB00493     | Acne Vulgaris                                                          | C0001144    |
| Cefotaxime       | DB00493     | Multiple Endocrine Neoplasia                                           | C0027662    |
| Cefotaxime       | DB00493     | Peripheral Vascular Diseases                                           | C0085096    |
| Nitazoxanide     | DB00507     | Severe Pain                                                            | C0278140    |
| Nitazoxanide     | DB00507     | Transplanted Organ Rejection                                           | C0345468    |
| Vancomycin       | DB00512     | Syphilis, Latent                                                       | C0039133    |
| Vancomycin       | DB00512     | Citrullinemia                                                          | C0175683    |
| Vancomycin       | DB00512     | Serum Sickness                                                         | C0036830    |
| Dextromethorphan | DB00514     | Status Asthmaticus                                                     | C0038218    |
| Ciprofloxacin    | DB00537     | Meningococcus Carrier                                                  | C0421162    |
| Ciprofloxacin    | DB00537     | Mucositis Following Radiation Therapy                                  | C0392190    |
| Ciprofloxacin    | DB00537     | Sepsis Due to Staphylococcus Aureus                                    | C2887088    |
| Vincristine      | DB00541     | Cutaneous Candidiasis                                                  | C0006846    |
| Propylthiouracil | DB00550     | Chlamydia Trachomatis Infection of Genital Structure                   | C1997322    |
| Methoxsalen      | DB00553     | Acute Moraxella Catarrhalis Bronchitis                                 | C0339932    |
| Methoxsalen      | DB00553     | Chronic Bacterial Prostatitis                                          | C1720797    |
| Carbamazepine    | DB00564     | Greasy Skin                                                            | C0234925    |
| Cephalexin       | DB00567     | Renal Osteodystrophy                                                   | C0035086    |
| Cephalexin       | DB00567     | Greasy Skin                                                            | C0234925    |
| Cephalexin       | DB00567     | Follicular Thyroid Carcinoma                                           | C0206682    |
| Clonidine        | DB00575     | Chlamydia Trachomatis Infection of Genital Structure                   | C1997322    |
| Sulfamethizole   | DB00576     | Lymphoma, Follicular                                                   | C0024301    |
| Sulfamethizole   | DB00576     | Injury Wounds                                                          | C0043250    |
| Sulfamethizole   | DB00576     | Onychomycosis                                                          | C0040261    |

Continued on next page

Table 2 – continued from previous page

| Drug name              | DrugBank ID | Disease name                                                           | Disease CUI |
|------------------------|-------------|------------------------------------------------------------------------|-------------|
| Lactulose              | DB00581     | Infection Due to Pseudomonas Aeruginosa                                | C0276075    |
| Lactulose              | DB00581     | Humoral Hypercalcemia of Malignancy (Disorder)                         | C0149911    |
| Lactulose              | DB00581     | Pruritus                                                               | C0033774    |
| Voriconazole           | DB00582     | Allergic Rhinitis (Disorder)                                           | C2607914    |
| Fluocinolone Acetonide | DB00591     | Moraxella Catarrhalis Pneumonia                                        | C0857831    |
| Oxytetracycline        | DB00595     | Drug-Induced Mucositis                                                 | C1274988    |
| Oxytetracycline        | DB00595     | Breastfeeding (Mother)                                                 | C1623040    |
| Oxytetracycline        | DB00595     | Septicemia Due to Enterococcus                                         | C0588233    |
| Ulobetasol             | DB00596     | Testicular Germ Cell Tumor                                             | C1336708    |
| Ulobetasol             | DB00596     | Anemia, Diamond-Blackfan                                               | C1260899    |
| Ulobetasol             | DB00596     | Parkinson Disease                                                      | C0030567    |
| Ulobetasol             | DB00596     | Malignant Lymphoma, Lymphocytic, Intermediate Differentiation, Diffuse | C0334634    |
| Ulobetasol             | DB00596     | Chronic Tubotympanic Suppurative Otitis Media                          | C0155440    |
| Ulobetasol             | DB00596     | Cutaneous Anthrax                                                      | C0003177    |
| Nafcillin              | DB00607     | Lower Respiratory Tract Infection                                      | C0149725    |
| Butorphanol            | DB00611     | Yaws                                                                   | C0043388    |
| Butorphanol            | DB00611     | Otitis Externa                                                         | C0029878    |
| Butorphanol            | DB00611     | Common Cold                                                            | C0009443    |
| Demeclocycline         | DB00618     | Acquired Partial Lipodystrophy                                         | C0220989    |
| Imatinib               | DB00619     | Enterobacter Pneumonia                                                 | C1096258    |
| Triamcinolone          | DB00620     | Impetigo                                                               | C0021099    |
| Triamcinolone          | DB00620     | Osteoporosis                                                           | C0029456    |
| Triamcinolone          | DB00620     | Coughing                                                               | C0010200    |
| Triamcinolone          | DB00620     | Gonococcal Joint Infection                                             | C0153216    |
| Triamcinolone          | DB00620     | Obesity                                                                | C0028754    |
| Triamcinolone          | DB00620     | Multiple Myeloma                                                       | C0026764    |
| Niacin                 | DB00627     | Bacterial Conjunctivitis                                               | C0009768    |
| Sulfacetamide          | DB00634     | Muscle Spasticity of Spinal Origin                                     | C1562430    |
| Prednisone             | DB00635     | Nausea and Vomiting                                                    | C0027498    |
| Prednisone             | DB00635     | Vomiting                                                               | C0042963    |
| Prednisone             | DB00635     | Mineral Deficiency                                                     | C0687148    |
| Prednisone             | DB00635     | Diabetic Foot Infection                                                | C0744130    |
| Prednisone             | DB00635     | Infection Due to Pseudomonas Aeruginosa                                | C0276075    |
| Astemizole             | DB00637     | Parkinsonian Disorders                                                 | C0242422    |
| Simvastatin            | DB00641     | Seborrheic Dermatitis                                                  | C0036508    |
| Simvastatin            | DB00641     | Acute Promyelocytic Leukemia                                           | C0023487    |
| Simvastatin            | DB00641     | Bronchitis, Chronic                                                    | C0008677    |
| Leucovorin             | DB00650     | Endemic Flea-Borne Typhus                                              | C0041472    |
| Pentazocine            | DB00652     | Acute Promyelocytic Leukemia                                           | C0023487    |
| Verapamil              | DB00661     | Female Hypogonadism Syndrome                                           | C0271578    |
| Verapamil              | DB00661     | Attention Deficit Hyperactivity Disorder                               | C1263846    |
| Trimethobenzamide      | DB00662     | Blast Phase                                                            | C0005699    |

Continued on next page

Table 2 – continued from previous page

| Drug name         | DrugBank ID | Disease name                              | Disease CUI |
|-------------------|-------------|-------------------------------------------|-------------|
| Trimethobenzamide | DB00662     | Yaws                                      | C0043388    |
| Cefixime          | DB00671     | Lower Respiratory Tract Infection         | C0149725    |
| Amphotericin B    | DB00681     | Cycloplegia                               | C0235238    |
| Amphotericin B    | DB00681     | Irritable Bowel Syndrome                  | C0022104    |
| Midazolam         | DB00683     | Rosacea                                   | C0035854    |
| Trovaflaxacin     | DB00685     | Itching of Eye                            | C0022281    |
| Trovaflaxacin     | DB00685     | Aspiration Pneumonitis                    | C1761609    |
| Trovaflaxacin     | DB00685     | Rhinitis                                  | C0035455    |
| Fludrocortisone   | DB00687     | Skin Diseases, Bacterial                  | C0162627    |
| Fludrocortisone   | DB00687     | Thyroiditis                               | C0040147    |
| Fludrocortisone   | DB00687     | Interstitial Cystitis                     | C0282488    |
| Fludrocortisone   | DB00687     | Rosacea                                   | C0035854    |
| Daunorubicin      | DB00694     | Haemophilus Parainfluenzae Pneumonia      | C0877633    |
| Daunorubicin      | DB00694     | Degenerative Polyarthrititis              | C0029408    |
| Daunorubicin      | DB00694     | Lymphoma, T-Cell, Cutaneous               | C0079773    |
| Daunorubicin      | DB00694     | Chronic Idiopathic Urticaria              | C0578870    |
| Tizandine         | DB00697     | Acute Promyelocytic Leukemia              | C0023487    |
| Nitrofurantoin    | DB00698     | Allergic Rhinitis (Disorder)              | C2607914    |
| Nitrofurantoin    | DB00698     | Sore Throat                               | C0242429    |
| Naltrexone        | DB00704     | Rhinitis, Vasomotor                       | C0035460    |
| Porfimer          | DB00707     | Pharyngitis Due to Haemophilus Influenzae | C2062475    |
| Porfimer          | DB00707     | Thyroiditis                               | C0040147    |
| Lamivudine        | DB00709     | Postoperative Infection                   | C0392618    |
| Ibandronate       | DB00710     | Headache Disorders                        | C0393735    |
| Oxacillin         | DB00713     | Hyperkeratosis                            | C0870082    |
| Oxacillin         | DB00713     | Streptococcal Sepsis                      | C0152964    |
| Azatadine         | DB00719     | Hodgkin Disease                           | C0019829    |
| Risperidone       | DB00734     | Scalp Psoriasis                           | C0406326    |
| Esomeprazole      | DB00736     | Papillary Thyroid Carcinoma               | C0238463    |
| Esomeprazole      | DB00736     | Lymphoma, T-Cell, Cutaneous               | C0079773    |
| Esomeprazole      | DB00736     | Candidiasis                               | C0006840    |
| Esomeprazole      | DB00736     | Nausea                                    | C0027497    |
| Hydrocortisone    | DB00741     | Gonorrhea of Pharynx                      | C0149966    |
| Hydrocortisone    | DB00741     | Malignant Tumor of Peritoneum             | C0153467    |
| Hydrocortisone    | DB00741     | Empyema, Pleural                          | C0014013    |
| Hydrocortisone    | DB00741     | Granuloma Inguinale                       | C0018190    |
| Scopolamine       | DB00747     | Bacterial Keratitis                       | C0854211    |
| Epinastine        | DB00751     | Impetigo                                  | C0021099    |
| Epinastine        | DB00751     | Abdominal Abscess                         | C0243001    |
| Ethotoin          | DB00754     | Uveitis                                   | C0042164    |
| Ethotoin          | DB00754     | Pelvic Inflammatory Disease               | C0242172    |
| Tretinoin         | DB00755     | Tetanus                                   | C0039614    |
| Tretinoin         | DB00755     | Chlamydial Urethritis                     | C1278807    |

Continued on next page

Table 2 – continued from previous page

| Drug name           | DrugBank ID | Disease name                                           | Disease CUI |
|---------------------|-------------|--------------------------------------------------------|-------------|
| Meropenem           | DB00760     | Urinary Tract Infection                                | C0042029    |
| Potassium Chloride  | DB00761     | Abdominal Abscess                                      | C0243001    |
| Mometasone          | DB00764     | Muscle Spasticity                                      | C0026838    |
| Alprostadil         | DB00770     | Lower Respiratory Tract Infection                      | C0149725    |
| Tirofiban           | DB00775     | Neonatal Meningitis                                    | C0456107    |
| Polymyxin B Sulfate | DB00781     | Septicemia Due to Bacteroides                          | C0276064    |
| Mefenamic acid      | DB00784     | Angioedema                                             | C0002994    |
| Mefenamic acid      | DB00784     | Gonorrhea                                              | C0018081    |
| Naproxen            | DB00788     | Lymphoma, Follicular                                   | C0024301    |
| Tripelennamine      | DB00792     | Pyelonephritis E Coli                                  | C0748196    |
| Gentamicin          | DB00798     | Labor Pain                                             | C0474368    |
| Gentamicin          | DB00798     | Polycystic Kidney, Autosomal Dominant                  | C0085413    |
| Gentamicin          | DB00798     | Osteitis Deformans                                     | C0029401    |
| Gentamicin          | DB00798     | Tinea Barbae                                           | C2349994    |
| Fenoldopam          | DB00800     | Hypercholesterolemia                                   | C0020443    |
| Fenoldopam          | DB00800     | Uric Acid Renal Calculus                               | C0558595    |
| Colistin            | DB00803     | Sepsis Due to Pseudomonas                              | C2887096    |
| Biperiden           | DB00810     | Endometriosis                                          | C0014175    |
| Menthol             | DB00825     | Meningococcal Meningitis                               | C0025294    |
| Fosfomycin          | DB00828     | Rhinoscleroma                                          | C0035468    |
| Diazepam            | DB00829     | Vitamin B 12 Deficiency                                | C0042847    |
| Diazepam            | DB00829     | Deficiency of Testosterone Biosynthesis                | C0342527    |
| Cefaclor            | DB00833     | Scarlet Fever                                          | C0036285    |
| Nalbuphine          | DB00844     | Follicular Thyroid Carcinoma                           | C0206682    |
| Nalbuphine          | DB00844     | Uric Acid Renal Calculus                               | C0558595    |
| Nalbuphine          | DB00844     | Tenosynovitis                                          | C0039520    |
| Clofazimine         | DB00845     | Enterobacter Pneumonia                                 | C1096258    |
| Temozolomide        | DB00853     | Lymphoma, Non-Hodgkin                                  | C0024305    |
| Terbinafine         | DB00857     | Q Fever Endocarditis                                   | C0340354    |
| Terbinafine         | DB00857     | Acute Gonococcal Cervicitis                            | C0153195    |
| Penicillamine       | DB00859     | Diarrhoea Predominant Irritable Bowel Syndrome         | C1262211    |
| Penicillamine       | DB00859     | Coughing                                               | C0010200    |
| Prednisolone        | DB00860     | Symptomatic Dermographism                              | C0343065    |
| Prednisolone        | DB00860     | Constipation                                           | C0009806    |
| Prednisolone        | DB00860     | Pruritus                                               | C0033774    |
| Prednisolone        | DB00860     | Muscle Spasticity of Spinal Origin                     | C1562430    |
| Terbutaline         | DB00871     | Malignant Otitis Externa Due to Pseudomonas Aeruginosa | C0395818    |
| Terbutaline         | DB00871     | Infection of Bone                                      | C2242472    |
| Loteprednol         | DB00873     | Tinea Cruris                                           | C1384589    |
| Loteprednol         | DB00873     | Streptococcal Pneumonia                                | C0155862    |
| Loteprednol         | DB00873     | Sepsis Due to Staphylococcus Aureus                    | C2887088    |
| Loteprednol         | DB00873     | Dry Eye Syndromes                                      | C0013238    |

Continued on next page

Table 2 – continued from previous page

| Drug name            | DrugBank ID | Disease name                                         | Disease CUI |
|----------------------|-------------|------------------------------------------------------|-------------|
| Loteprednol          | DB00873     | Drug-Induced Mucositis                               | C1274988    |
| Loteprednol          | DB00873     | Yaws                                                 | C0043388    |
| Loteprednol          | DB00873     | Relapsing Fever                                      | C0035021    |
| Guaifenesin          | DB00874     | Chronic Bacterial Prostatitis                        | C1720797    |
| Guaifenesin          | DB00874     | Gout                                                 | C0018099    |
| Sirrolimus           | DB00877     | Psoriasis                                            | C0033860    |
| Isosorbide Dinitrate | DB00883     | Tinea Corporis (Disorder)                            | C0040252    |
| Pemirolast           | DB00885     | Infection Due to Pseudomonas Aeruginosa              | C0276075    |
| Dienestrol           | DB00890     | Anxiety                                              | C0003467    |
| Dienestrol           | DB00890     | Angioedema                                           | C0002994    |
| Methdilazine         | DB00902     | Urinary Tract Infection Citrobacter                  | C0749955    |
| Amantadine           | DB00915     | Staphylococcal Pneumonia                             | C0032308    |
| Metronidazole        | DB00916     | Labor Pain                                           | C0474368    |
| Dinoprostone         | DB00917     | Chlamydia Trachomatis Infection of Genital Structure | C1997322    |
| Buprenorphine        | DB00921     | Rhinorrhea                                           | C1260880    |
| Buprenorphine        | DB00921     | Adrenal Cortical Hypofunction                        | C0405580    |
| Maprotiline          | DB00934     | Symptomatic Dermographism                            | C0343065    |
| Salicylic acid       | DB00936     | Klebsiella Sepsis                                    | C0745528    |
| Phenprocoumon        | DB00946     | Peptic Ulcer                                         | C0030920    |
| Mezlocillin          | DB00948     | Chlamydia Trachomatis Infection of Genital Structure | C1997322    |
| Mezlocillin          | DB00948     | Deficiency of Testosterone Biosynthesis              | C0342527    |
| Dirithromycin        | DB00954     | Metastasis From Malignant Tumor of Colon             | C1282500    |
| Hydrocodone          | DB00956     | Urinary Tract Infection                              | C0042029    |
| Methylprednisolone   | DB00959     | Raynaud Disease                                      | C0034734    |
| Methylprednisolone   | DB00959     | Acute Exacerbation of Chronic Bronchitis             | C0856695    |
| Methylprednisolone   | DB00959     | Asymptomatic Left Ventricular Systolic Dysfunction   | C3698411    |
| Zaleplon             | DB00962     | Labor Pain                                           | C0474368    |
| Desloratadine        | DB00967     | Genitourinary Tract Infection                        | C1279247    |
| Alosetron            | DB00969     | Proteus Urinary Tract Infection                      | C0577709    |
| Alosetron            | DB00969     | Glioblastoma Multiforme of Brain                     | C0349543    |
| Selenium Sulfide     | DB00971     | Granuloma Inguinale                                  | C0018190    |
| Edetic Acid          | DB00974     | Blast Phase                                          | C0005699    |
| Dipyridamole         | DB00975     | Trachoma                                             | C0040592    |
| Formoterol           | DB00983     | Common Cold                                          | C0009443    |
| Dimenhydrinate       | DB00985     | Myocardial Infarction                                | C0027051    |
| Rivastigmine         | DB00989     | Bronchitis                                           | C0006277    |
| Neomycin             | DB00994     | Pneumonia Due to Escherichia Coli                    | C0276089    |
| Gabapentin           | DB00996     | Epicondylitis                                        | C0014488    |
| Doxorubicin          | DB00997     | Malaria, Vivax                                       | C0024537    |
| Doxorubicin          | DB00997     | Chronic Idiopathic Constipation                      | C0267509    |
| Doxorubicin          | DB00997     | Osteomalacia                                         | C0029442    |
| Hydrochlorothiazide  | DB00999     | Rhinitis, Vasomotor                                  | C0035460    |
| Ganciclovir          | DB01004     | Anemia, Pernicious                                   | C0002892    |

Continued on next page



Table 2 – continued from previous page

| Drug name             | DrugBank ID | Disease name                                                   | Disease CUI |
|-----------------------|-------------|----------------------------------------------------------------|-------------|
| Ganciclovir           | DB01004     | Muscle Spasticity of Spinal Origin                             | C1562430    |
| Clobetasol propionate | DB01013     | Herpes Zoster Keratitis                                        | C1275687    |
| Sulfamethoxazole      | DB01015     | Allergic Otitis Externa                                        | C1320547    |
| Sulfamethoxazole      | DB01015     | Onychomycosis                                                  | C0040261    |
| Sulfamethoxazole      | DB01015     | Iridocyclitis                                                  | C0022073    |
| Sulfamethoxazole      | DB01015     | Syphilis, Latent                                               | C0039133    |
| Minocycline           | DB01017     | Lichen Simplex Chronicus                                       | C0149922    |
| Minocycline           | DB01017     | Acute Bacterial Sinusitis                                      | C0275556    |
| Minocycline           | DB01017     | Zollinger-Ellison Syndrome                                     | C0043515    |
| Minocycline           | DB01017     | Septicemia Due to Enterococcus                                 | C0588233    |
| Minocycline           | DB01017     | Erythema Multiforme                                            | C0014742    |
| Guanfacine            | DB01018     | Epilepsy Characterized By Intractable Complex Partial Seizures | C2711653    |
| Topotecan             | DB01030     | Serratia Sepsis                                                | C0152973    |
| Mercaptopurine        | DB01033     | Sarcoidosis                                                    | C0036202    |
| Selegiline            | DB01037     | Nasal Congestion (Finding)                                     | C0027424    |
| Selegiline            | DB01037     | Osteomalacia                                                   | C0029442    |
| Thalidomide           | DB01041     | Pharyngitis                                                    | C0031350    |
| Fluocinonide          | DB01047     | Myelofibrosis                                                  | C0026987    |
| Fluocinonide          | DB01047     | Malignant Ascites                                              | C0220656    |
| Ibuprofen             | DB01050     | Common Cold                                                    | C0009443    |
| Ibuprofen             | DB01050     | Renal Disease With Edema Nos                                   | C0866125    |
| Benzylpenicillin      | DB01053     | Rosacea                                                        | C0035854    |
| Benzylpenicillin      | DB01053     | Malignant Neoplasm of Ovary                                    | C1140680    |
| Praziquantel          | DB01058     | Bacterial Conjunctivitis                                       | C0009768    |
| Norfloxacin           | DB01059     | Central Retinal Vein Occlusion With Macular Edema              | C0339498    |
| Norfloxacin           | DB01059     | Pemphigus                                                      | C0030807    |
| Norfloxacin           | DB01059     | Extrapyramidal Disorders                                       | C0015371    |
| Amoxicillin           | DB01060     | Anthrax Disease                                                | C0003175    |
| Amoxicillin           | DB01060     | Irritable Bowel Syndrome                                       | C0022104    |
| Amoxicillin           | DB01060     | Aspergillosis                                                  | C0004030    |
| Amoxicillin           | DB01060     | Chronic Obstructive Airway Disease                             | C0024117    |
| Azlocillin            | DB01061     | Lung Abscess                                                   | C0024110    |
| Azlocillin            | DB01061     | Metastatic Prostate Carcinoma                                  | C0936223    |
| Cefditoren            | DB01066     | Hepatic Coma                                                   | C0019147    |
| Dihydroxycholesterol  | DB01070     | Goiter                                                         | C0018021    |
| Etidronic acid        | DB01077     | Urinary Tract Infection Enterococcus                           | C0749958    |
| Vigabatrin            | DB01080     | Beta Thalassemia                                               | C0005283    |
| Vigabatrin            | DB01080     | Vascular Diseases                                              | C0042373    |
| Streptomycin          | DB01082     | Shigella Infections                                            | C0013371    |
| Streptomycin          | DB01082     | Genitourinary Tract Infection                                  | C1279247    |
| Pilocarpine           | DB01085     | Secondary Malignant Neoplasm of Stomach                        | C0686068    |
| Pilocarpine           | DB01085     | Septicemia Candida                                             | C0349009    |

Continued on next page

Table 2 – continued from previous page

| Drug name        | DrugBank ID | Disease name                                                   | Disease CUI |
|------------------|-------------|----------------------------------------------------------------|-------------|
| Pilocarpine      | DB01085     | Granuloma Annulare                                             | C0085074    |
| Capecitabine     | DB01101     | Muscle Spasticity                                              | C0026838    |
| Sertraline       | DB01104     | Chronic Idiopathic Constipation                                | C0267509    |
| Miconazole       | DB01110     | Chancroids                                                     | C0007947    |
| Colistimethate   | DB01111     | Nasal Congestion (Finding)                                     | C0027424    |
| Cefuroxime       | DB01112     | Arthritis, Psoriatic                                           | C0003872    |
| Cefuroxime       | DB01112     | Thromboembolism                                                | C0040038    |
| Cefuroxime       | DB01112     | Arthropod Bite Wound                                           | C1444173    |
| Cefuroxime       | DB01112     | Pneumonia Due to Pseudomonas                                   | C0155860    |
| Cefuroxime       | DB01112     | Rectal Pain                                                    | C0034886    |
| Diazoxide        | DB01119     | Degenerative Polyarthritis                                     | C0029408    |
| Phenacemide      | DB01121     | Acute Postoperative Pain                                       | C2215257    |
| Phenacemide      | DB01121     | Ocular Hypertension                                            | C0028840    |
| Rabeprazole      | DB01129     | Pneumonia Due to Escherichia Coli                              | C0276089    |
| Rabeprazole      | DB01129     | Epilepsy Characterized By Intractable Complex Partial Seizures | C2711653    |
| Levofloxacin     | DB01137     | Scurfiness of Scalp                                            | C0423775    |
| Levofloxacin     | DB01137     | Vomiting                                                       | C0042963    |
| Levofloxacin     | DB01137     | Mixed Anxiety and Depressive Disorder                          | C0338908    |
| Levofloxacin     | DB01137     | Lymphogranuloma Venereum                                       | C0024286    |
| Levofloxacin     | DB01137     | Echinococcus Granulosus Infection of Liver                     | C0153289    |
| Levofloxacin     | DB01137     | Schistosomiasis                                                | C0036323    |
| Levofloxacin     | DB01137     | Malignant Neoplasm of Stomach Stage Iv                         | C0278498    |
| Cefapirin        | DB01139     | Initial Insomnia                                               | C0393760    |
| Cefapirin        | DB01139     | Opisthorchiasis                                                | C0029106    |
| Cefapirin        | DB01139     | Malignant Neoplasm of Liver                                    | C0345904    |
| Cefapirin        | DB01139     | Serratia Sepsis                                                | C0152973    |
| Cefadroxil       | DB01140     | Injury Wounds                                                  | C0043250    |
| Diphenylpyraline | DB01146     | Breastfeeding (Mother)                                         | C1623040    |
| Flavoxate        | DB01148     | Multiple Myeloma                                               | C0026764    |
| Cefprozil        | DB01150     | Laryngeal Edema                                                | C0023052    |
| Cefprozil        | DB01150     | Staphylococcal Skin Infections                                 | C0038166    |
| Gemifloxacin     | DB01155     | Chronic Tubotympanic Suppurative Otitis Media                  | C0155440    |
| Gemifloxacin     | DB01155     | Nosocomial Pneumonia                                           | C0949083    |
| Gemifloxacin     | DB01155     | Staphylococcus Aureus Infection                                | C1318973    |
| Bretylium        | DB01158     | Angioedema                                                     | C0002994    |
| Ofloxacin        | DB01165     | Urge Incontinence                                              | C0150045    |
| Ofloxacin        | DB01165     | Itching of Ear                                                 | C0849907    |
| Ofloxacin        | DB01165     | Low Cardiac Output Syndrome                                    | C0600177    |
| Ofloxacin        | DB01165     | Scalp Dermatoses                                               | C0036271    |
| Ofloxacin        | DB01165     | Impetigo                                                       | C0021099    |
| Itraconazole     | DB01167     | Primary Malignant Neoplasm of Gastrointestinal Tract           | C1306632    |
| Itraconazole     | DB01167     | Drug-Induced Mucositis                                         | C1274988    |

Continued on next page

Table 2 – continued from previous page

| Drug name        | DrugBank ID | Disease name                                     | Disease CUI |
|------------------|-------------|--------------------------------------------------|-------------|
| Itraconazole     | DB01167     | Low Cardiac Output Syndrome                      | C0600177    |
| Arsenic trioxide | DB01169     | Cutaneous Candidiasis                            | C0006846    |
| Arsenic trioxide | DB01169     | Rheumatic Heart Disease                          | C0035439    |
| Arsenic trioxide | DB01169     | Lymphoma, T-Cell, Cutaneous                      | C0079773    |
| Arsenic trioxide | DB01169     | Peritonitis                                      | C0031154    |
| Arsenic trioxide | DB01169     | Arthritis, Gouty                                 | C0003868    |
| Orphenadrine     | DB01173     | Chemotherapy-Induced Nausea and Vomiting         | C0401160    |
| Escitalopram     | DB01175     | Mydriasis                                        | C0026961    |
| Escitalopram     | DB01175     | Chronic Pain                                     | C0150055    |
| Sparfloxacin     | DB01208     | Intractable Hiccups                              | C0744896    |
| Sparfloxacin     | DB01208     | Pneumonia Due to Klebsiella Pneumoniae           | C0519030    |
| Sparfloxacin     | DB01208     | Salmonella Sepsis                                | C0152486    |
| Sparfloxacin     | DB01208     | Urinary Retention                                | C0080274    |
| Sparfloxacin     | DB01208     | Osteoporosis, Postmenopausal                     | C0029458    |
| Sparfloxacin     | DB01208     | Dacryocystitis                                   | C0010930    |
| Sparfloxacin     | DB01208     | Uric Acid Renal Calculus                         | C0558595    |
| Clarithromycin   | DB01211     | Acromegaly                                       | C0001206    |
| Clarithromycin   | DB01211     | Initial Insomnia                                 | C0393760    |
| Ceftriaxone      | DB01212     | Vomiting                                         | C0042963    |
| Ceftriaxone      | DB01212     | Onychomycosis of Fingernails                     | C1274469    |
| Fomepizole       | DB01213     | Bacterial Infection Due to Klebsiella Pneumoniae | C0343402    |
| Finasteride      | DB01216     | Allergic Conjunctivitis                          | C0009766    |
| Finasteride      | DB01216     | Female Genital Tract Infection                   | C1263758    |
| Dantrolene       | DB01219     | Corneal Perforation                              | C0339293    |
| Dantrolene       | DB01219     | Dermatitis Herpetiformis                         | C0011608    |
| Rifaximin        | DB01220     | Motion Sickness                                  | C0026603    |
| Rifaximin        | DB01220     | Pain                                             | C0030193    |
| Budesonide       | DB01222     | Enterobacteriaceae Infections                    | C0014347    |
| Metoclopramide   | DB01233     | Tetanus                                          | C0039614    |
| Metoclopramide   | DB01233     | Escherichia Coli Urinary Tract Infection         | C0577708    |
| Metoclopramide   | DB01233     | Acute Gonococcal Epididymo-Orchitis              | C0153193    |
| Dexamethasone    | DB01234     | Endometriosis                                    | C0014175    |
| Dexamethasone    | DB01234     | Hereditary Orotic Aciduria                       | C0220987    |
| Dexamethasone    | DB01234     | Hepatitis C, Chronic                             | C0524910    |
| Dexamethasone    | DB01234     | Mineral Deficiency                               | C0687148    |
| Dexamethasone    | DB01234     | Urinary Tract Infection                          | C0042029    |
| Dexamethasone    | DB01234     | Hepatolenticular Degeneration                    | C0019202    |
| Dexamethasone    | DB01234     | Q Fever Endocarditis                             | C0340354    |
| Epoprostenol     | DB01240     | Redness of Eye                                   | C0235267    |
| Epoprostenol     | DB01240     | Edema                                            | C0013604    |
| Alimemazine      | DB01246     | Tetanus                                          | C0039614    |
| Docetaxel        | DB01248     | Female Hypogonadism Syndrome                     | C0271578    |
| Eculizumab       | DB01257     | Lower Respiratory Tract Infection                | C0149725    |

Continued on next page

Table 2 – continued from previous page

| Drug name             | DrugBank ID | Disease name                                 | Disease CUI |
|-----------------------|-------------|----------------------------------------------|-------------|
| Eculizumab            | DB01257     | Motion Sickness                              | C0026603    |
| Eculizumab            | DB01257     | Congestive Heart Failure                     | C0018802    |
| Eculizumab            | DB01257     | Osteitis Deformans                           | C0029401    |
| Desonide              | DB01260     | Metastasis From Malignant Tumor of Colon     | C1282500    |
| Desonide              | DB01260     | Autoimmune Hemolytic Anemia                  | C0002880    |
| Desonide              | DB01260     | Chronic Lymphocytic Leukemia                 | C0023434    |
| Desonide              | DB01260     | Pyelonephritis E Coli                        | C0748196    |
| Sinecatechins         | DB01266     | Typhus                                       | C0041471    |
| Sinecatechins         | DB01266     | Bartonella Infections                        | C0004771    |
| Sinecatechins         | DB01266     | Labor Pain                                   | C0474368    |
| Sinecatechins         | DB01266     | Ankylosing Spondylitis                       | C0038013    |
| Sinecatechins         | DB01266     | Escherichia Coli Septicemia                  | C0276088    |
| Sinecatechins         | DB01266     | Gonococcal Infection Disseminated            | C0744451    |
| Hydralazine           | DB01275     | Acute Gonococcal Cervicitis                  | C0153195    |
| Carbetocin            | DB01282     | Infection of Skin And/Or Subcutaneous Tissue | C0178299    |
| Bismuth Subsalicylate | DB01294     | Trachoma                                     | C0040592    |
| Cefamandole           | DB01326     | Atrophic Vaginitis                           | C0221392    |
| Cefamandole           | DB01326     | Typhus, Epidemic Louse-Borne                 | C0041473    |
| Cefamandole           | DB01326     | Irritable Bowel Syndrome                     | C0022104    |
| Cefamandole           | DB01326     | Dacryocystitis                               | C0010930    |
| Cefazolin             | DB01327     | Septicemia Due to Enterococcus               | C0588233    |
| Cefazolin             | DB01327     | Psoriasis                                    | C0033860    |
| Cefazolin             | DB01327     | Chlamydial Pneumonia                         | C0339959    |
| Cefotetan             | DB01330     | Ethylene Glycol Poisoning (Disorder)         | C0413194    |
| Cefotetan             | DB01330     | Impetigo                                     | C0021099    |
| Cefotetan             | DB01330     | Initial Insomnia                             | C0393760    |
| Cefotetan             | DB01330     | Recurrent Herpes Simplex Labialis            | C1274321    |
| Cefoxitin             | DB01331     | Erectile Dysfunction                         | C0242350    |
| Cefoxitin             | DB01331     | Body Louse Infestation                       | C0030758    |
| Cefoxitin             | DB01331     | Accidental Poisoning By Methyl Alcohol       | C0261439    |
| Cefoxitin             | DB01331     | Nocardia Infections                          | C0028242    |
| Ceftizoxime           | DB01332     | Postherpetic Neuralgia                       | C0032768    |
| Cefradine             | DB01333     | Listeriosis                                  | C0023860    |
| Cefradine             | DB01333     | Meningococcal Meningitis                     | C0025294    |
| Lithium               | DB01356     | Chemotherapy-Induced Nausea and Vomiting     | C0401160    |
| Magnesium oxide       | DB01377     | Drug-Induced Mucositis                       | C1274988    |
| Cortisone acetate     | DB01380     | Allergic Otitis Externa                      | C1320547    |
| Cortisone acetate     | DB01380     | Acute Amebiasis                              | C0152499    |
| Cortisone acetate     | DB01380     | Boutonneuse Fever                            | C0006060    |
| Cortisone acetate     | DB01380     | Greasy Skin                                  | C0234925    |
| Cortisone acetate     | DB01380     | Obesity                                      | C0028754    |
| Magnesium salicylate  | DB01397     | Pneumonia Due to Staphylococcus Aureus       | C2349530    |
| Cefepime              | DB01413     | Adenocarcinoma of Pancreas                   | C0281361    |

Continued on next page

Table 2 – continued from previous page

| Drug name          | DrugBank ID | Disease name                             | Disease CUI |
|--------------------|-------------|------------------------------------------|-------------|
| Ceftibuten         | DB01415     | Typhus, Epidemic Louse-Borne             | C0041473    |
| Ceftibuten         | DB01415     | Epilepsy                                 | C0014544    |
| Ceftibuten         | DB01415     | Epicondylitis                            | C0014488    |
| Ceftibuten         | DB01415     | Arthropathy Associated With Infection    | C0157749    |
| Paromomycin        | DB01421     | Epilepsies, Myoclonic                    | C0014550    |
| Paromomycin        | DB01421     | Secondary Physiologic Amenorrhea         | C0232940    |
| Paromomycin        | DB01421     | Actinic Keratosis                        | C0022602    |
| Ethyl loflazepate  | DB01545     | Hypertensive Disease                     | C0020538    |
| Ethyl loflazepate  | DB01545     | Pneumonia Due to Staphylococcus Aureus   | C2349530    |
| Dihydrocodeine     | DB01551     | Accidental Poisoning By Methyl Alcohol   | C0261439    |
| Dihydrocodeine     | DB01551     | Enteric Campylobacteriosis               | C0275982    |
| Dihydrocodeine     | DB01551     | Breastfeeding (Mother)                   | C1623040    |
| Dextroamphetamine  | DB01576     | Rhinorrhea                               | C1260880    |
| Oxprenolol         | DB01580     | Chronic Idiopathic Urticaria             | C0578870    |
| Oxprenolol         | DB01580     | Diarrhea                                 | C0011991    |
| Everolimus         | DB01590     | Allergic Conjunctivitis                  | C0009766    |
| Cilastatin         | DB01597     | Rhinorrhea                               | C1260880    |
| Cilastatin         | DB01597     | Mixed Bipolar I Disorder                 | C0236780    |
| Bacampicillin      | DB01602     | Enterobiasis                             | C0086227    |
| Bacampicillin      | DB01602     | Parkinsonian Disorders                   | C0242422    |
| Bacampicillin      | DB01602     | Bacterial Vaginosis                      | C0085166    |
| Bacampicillin      | DB01602     | Exanthema                                | C0015230    |
| Tazobactam         | DB01606     | Blast Phase                              | C0005699    |
| Ticarcillin        | DB01607     | Paronychia Inflammation                  | C0030578    |
| Ticarcillin        | DB01607     | Paroxysmal Nocturnal Hemoglobinuria      | C0024790    |
| Ticarcillin        | DB01607     | Secondary Malignant Neoplasm of Pancreas | C0346976    |
| Ticarcillin        | DB01607     | Chancroids                               | C0007947    |
| Deferasirox        | DB01609     | Skin Irritation                          | C0152030    |
| Deferasirox        | DB01609     | Lichen Simplex Chronicus                 | C0149922    |
| Hydroxychloroquine | DB01611     | Diabetic Macular Edema                   | C0730285    |
| Phenindamine       | DB01619     | Sore Throat                              | C0242429    |
| Pheniramine        | DB01620     | Non-Small Cell Lung Carcinoma            | C0007131    |
| Fusidic Acid       | DB02703     | Drug-Induced Mucositis                   | C1274988    |
| Phenol             | DB03255     | Incomplete Passage of Stool              | C0426639    |
| Phenol             | DB03255     | Mucormycosis                             | C0026718    |
| Phenol             | DB03255     | Chlamydial Pneumonia                     | C0339959    |
| Phenol             | DB03255     | Hypophosphatemia                         | C0085682    |
| Urea               | DB03904     | Rhinitis                                 | C0035455    |
| Trioxsalen         | DB04571     | Listeriosis                              | C0023860    |
| Trioxsalen         | DB04571     | Trachoma                                 | C0040592    |
| Trioxsalen         | DB04571     | Greasy Skin                              | C0234925    |
| Quinestrol         | DB04575     | Abdominal Abscess                        | C0243001    |
| Clofedanol         | DB04837     | Musculoskeletal Diseases                 | C0026857    |

Continued on next page

Table 2 – continued from previous page

| Drug name             | DrugBank ID | Disease name                                                           | Disease CUI |
|-----------------------|-------------|------------------------------------------------------------------------|-------------|
| Nilotinib             | DB04868     | Urinary Tract Infection                                                | C0042029    |
| Nesiritide            | DB04899     | Psittacosis                                                            | C0029291    |
| Ustekinumab           | DB05679     | Pneumonia Due to Klebsiella Pneumoniae                                 | C0519030    |
| Acetylcysteine        | DB06151     | Bedwetting                                                             | C0270327    |
| Canakinumab           | DB06168     | Onychomycosis Due to Trichophyton Mentagrophytes                       | C0276755    |
| Romidepsin            | DB06176     | Arthropod Bite Wound                                                   | C1444173    |
| Romidepsin            | DB06176     | Zollinger-Ellison Syndrome                                             | C0043515    |
| Asenapine             | DB06216     | Malignant Lymphoma, Lymphocytic, Intermediate Differentiation, Diffuse | C0334634    |
| Dalbavancin           | DB06219     | Bacterial Conjunctivitis                                               | C0009768    |
| Ziconotide            | DB06283     | Lymphogranuloma Venereum                                               | C0024286    |
| Ziconotide            | DB06283     | Adrenogenital Disorder                                                 | C0701163    |
| Temsirolimus          | DB06287     | Calcium Renal Calculus                                                 | C1959799    |
| Temsirolimus          | DB06287     | Complex Dyslipidemia                                                   | C3875286    |
| Temsirolimus          | DB06287     | Chemotherapy-Induced Nausea and Vomiting                               | C0401160    |
| Temsirolimus          | DB06287     | Bacterial Urinary Infection                                            | C0729524    |
| Temsirolimus          | DB06287     | Simple Pulmonary Eosinophilia                                          | C0242459    |
| Telavancin            | DB06402     | Supraventricular Tachycardia                                           | C0039240    |
| Telavancin            | DB06402     | Boutonneuse Fever                                                      | C0006060    |
| Telavancin            | DB06402     | Incomplete Passage of Stool                                            | C0426639    |
| Telavancin            | DB06402     | Inhalational Anthrax                                                   | C0155866    |
| Ceftaroline fosamil   | DB06590     | Oral Candidiasis                                                       | C0006849    |
| Ceftaroline fosamil   | DB06590     | Nausea                                                                 | C0027497    |
| Denosumab             | DB06643     | Rhinitis                                                               | C0035455    |
| Denosumab             | DB06643     | Skin Irritation                                                        | C0152030    |
| Mepyramine            | DB06691     | Blast Phase                                                            | C0005699    |
| Xylometazoline        | DB06694     | Oropharyngeal Candidiasis                                              | C0919659    |
| Xylometazoline        | DB06694     | Female Genital Tract Infection                                         | C1263758    |
| Naphazoline           | DB06711     | Oropharyngeal Candidiasis                                              | C0919659    |
| Glycine betaine       | DB06756     | Scabies <Infestation>                                                  | C0036262    |
| Glycine betaine       | DB06756     | Fever                                                                  | C0015967    |
| Ammonium lactate      | DB06768     | Mycoplasma Pneumonia                                                   | C0032302    |
| Ammonium lactate      | DB06768     | Septicemia Due to Enterococcus                                         | C0588233    |
| Benzyl alcohol        | DB06770     | Hodgkin Disease                                                        | C0019829    |
| Dimercaprol           | DB06782     | Chronic Obstructive Airway Disease                                     | C0024117    |
| Dimercaprol           | DB06782     | Anemia, Pernicious                                                     | C0002892    |
| Dimercaprol           | DB06782     | Psittacosis                                                            | C0029291    |
| Lanreotide            | DB06791     | Pruritus Ani                                                           | C0033775    |
| Lodoxamide            | DB06794     | Blast Phase                                                            | C0005699    |
| Lodoxamide            | DB06794     | Glaucoma, Open-Angle                                                   | C0017612    |
| Niclosamide           | DB06803     | Rickettsialpox                                                         | C0035597    |
| Sodium phenylbutyrate | DB06819     | Pneumonia Due to Pseudomonas                                           | C0155860    |
| Antazoline            | DB08799     | Nocardia Infections                                                    | C0028242    |

Continued on next page

Table 2 – continued from previous page

| Drug name          | DrugBank ID | Disease name                                 | Disease CUI |
|--------------------|-------------|----------------------------------------------|-------------|
| Roxatidine acetate | DB08806     | Duodenal Ulcer                               | C0013295    |
| Ticagrelor         | DB08816     | Cholera                                      | C0008354    |
| Affibercept        | DB08885     | Scurfiness of Scalp                          | C0423775    |
| Linaclotide        | DB08890     | Inclusion Conjunctivitis                     | C0009770    |
| Linaclotide        | DB08890     | Sarcoidosis                                  | C0036202    |
| Linaclotide        | DB08890     | Decompensated Cardiac Failure                | C0581377    |
| Linaclotide        | DB08890     | Paroxysmal Nocturnal Hemoglobinuria          | C0024790    |
| Bedaquiline        | DB08903     | Coughing                                     | C0010200    |
| Certolizumab pegol | DB08904     | Scalp Psoriasis                              | C0406326    |
| Riociguat          | DB08931     | Bacterial Keratitis                          | C0854211    |
| Riociguat          | DB08931     | Anemia, Diamond-Blackfan                     | C1260899    |
| Riociguat          | DB08931     | Impetigo                                     | C0021099    |
| Riociguat          | DB08931     | Hay Fever                                    | C0018621    |
| Luliconazole       | DB08933     | Scalp Psoriasis                              | C0406326    |
| Chlorcyclizine     | DB08936     | Proteus Septicemia                           | C0577690    |
| Chlorcyclizine     | DB08936     | Bursitis                                     | C0006444    |
| Chlorcyclizine     | DB08936     | Rocky Mountain Spotted Fever                 | C0035793    |
| Isoxsuprine        | DB08941     | Motion Sickness                              | C0026603    |
| Vedolizumab        | DB09033     | Plague                                       | C0032064    |
| Efinaconazole      | DB09040     | Familial Hypercholesterolemia - Heterozygous | C0342882    |
| Metreleptin        | DB09046     | Rosacea                                      | C0035854    |
| Ceftolozane        | DB09050     | Enterobacteriaceae Infections                | C0014347    |
| Avibactam          | DB09060     | Urinary Tract Infection                      | C0042029    |
| Olaparib           | DB09074     | Syphilis, Congenital                         | C0039131    |
| Lenvatinib         | DB09078     | Vomiting                                     | C0042963    |
| Lenvatinib         | DB09078     | Hypercalcemia                                | C0020437    |
| Lenvatinib         | DB09078     | Endometritis                                 | C0014179    |
| Lenvatinib         | DB09078     | Infection Caused By Enterobacter             | C0948205    |
| Vilanterol         | DB09082     | Rickettsia Infections                        | C0035585    |
| Vilanterol         | DB09082     | Iron Deficiency Anemia                       | C0162316    |
| Vilanterol         | DB09082     | Inflammatory Dermatitis                      | C3875321    |
| Vilanterol         | DB09082     | Rheumatic Heart Disease                      | C0035439    |
| Vilanterol         | DB09082     | Rheumatoid Arthritis                         | C0003873    |
| Vilanterol         | DB09082     | Bacterial Keratitis                          | C0854211    |
| Benzoyl peroxide   | DB09096     | Gastrointestinal Anthrax                     | C0152945    |
| Stiripentol        | DB09118     | Punctate Keratitis                           | C0259799    |
| Stiripentol        | DB09118     | Acute Postoperative Pain                     | C2215257    |
| Stiripentol        | DB09118     | Pruritus                                     | C0033774    |
| Stiripentol        | DB09118     | Laryngeal Edema                              | C0023052    |
| Stiripentol        | DB09118     | Supraventricular Tachycardia                 | C0039240    |
| Potassium Citrate  | DB09125     | Breastfeeding (Mother)                       | C1623040    |
| Potassium Citrate  | DB09125     | Arteriosclerosis                             | C0003850    |
| Uridine triacetate | DB09144     | Allergic Conjunctivitis                      | C0009766    |

Continued on next page

Table 2 – continued from previous page

| Drug name                                | DrugBank ID | Disease name                                  | Disease CUI |
|------------------------------------------|-------------|-----------------------------------------------|-------------|
| Moxisylyte                               | DB09205     | Non-Gonococcal Urethritis (Ngu)               | C1112709    |
| Dexibuprofen                             | DB09213     | Syphilis                                      | C0039128    |
| Dexibuprofen                             | DB09213     | Blastomycosis                                 | C0005716    |
| Dexibuprofen                             | DB09213     | Thyroiditis                                   | C0040147    |
| Dexibuprofen                             | DB09213     | Diabetic Foot Infection                       | C0744130    |
| Dexibuprofen                             | DB09213     | Tetanus                                       | C0039614    |
| Bemiparin                                | DB09258     | Allergic Rhinitis (Disorder)                  | C2607914    |
| Polyethylene glycol                      | DB09287     | Gonorrhea of Rectum                           | C0275665    |
| Alirocumab                               | DB09302     | Sneezing                                      | C0037383    |
| Evolocumab                               | DB09303     | Breastfeeding (Mother)                        | C1623040    |
| Procaine benzylpenicillin                | DB09320     | Chronic Tubotympanic Suppurative Otitis Media | C0155440    |
| Procaine benzylpenicillin                | DB09320     | Complex Dyslipidemia                          | C3875286    |
| Zinc oxide                               | DB09321     | Herpes Zoster Keratitis                       | C1275687    |
| Zinc oxide                               | DB09321     | Urinary Tract Infection Enterococcus          | C0749958    |
| Zinc oxide                               | DB09321     | Ankylosing Spondylitis                        | C0038013    |
| Zinc sulfate                             | DB09322     | Brucellosis                                   | C0006309    |
| Zinc sulfate                             | DB09322     | Lupus Erythematosus, Discoid                  | C0024138    |
| Zinc sulfate                             | DB09322     | Asthma                                        | C0004096    |
| Zinc sulfate                             | DB09322     | Pneumonia, Bacterial                          | C0004626    |
| Levobetaxolol                            | DB09351     | Epicondylitis                                 | C0014488    |
| Sulfur                                   | DB09353     | Accidental Poisoning By Methyl Alcohol        | C0261439    |
| Sulfur                                   | DB09353     | Klebsiella Cystitis                           | C0520775    |
| Dexpanthenol                             | DB09357     | Acute Otitis Media                            | C0271429    |
| Dexpanthenol                             | DB09357     | Escherichia Coli Urinary Tract Infection      | C0577708    |
| Dexpanthenol                             | DB09357     | Bartonella Infections                         | C0004771    |
| Norgestrel                               | DB09389     | Pneumonia, Bacterial                          | C0004626    |
| Norgestrel                               | DB09389     | Pelvic Inflammatory Disease                   | C0242172    |
| Norgestrel                               | DB09389     | Chickenpox                                    | C0008049    |
| Enalaprilat                              | DB09477     | Mucositis Following Radiation Therapy         | C0392190    |
| Cysteine hydrochloride                   | DB09485     | Epicondylitis                                 | C0014488    |
| Acrivastine                              | DB09488     | Escherichia Coli Septicemia                   | C0276088    |
| Acrivastine                              | DB09488     | Miscarriage With Sepsis                       | C0269398    |
| Acrivastine                              | DB09488     | Erectile Dysfunction                          | C0242350    |
| Sodium ferric gluconate complex          | DB09517     | Chlamydial Urethritis                         | C1278807    |
| Sodium ferric gluconate complex          | DB09517     | Acute Bacterial Sinusitis                     | C0275556    |
| Sodium phosphate, monobasic, monohydrate | DB09525     | Rhinitis                                      | C0035455    |
| Sodium phosphate, monobasic, monohydrate | DB09525     | Acute Gonococcal Cervicitis                   | C0153195    |
| Dexchlorpheniramine maleate              | DB09555     | Gonorrhea of Pharynx                          | C0149966    |

Continued on next page



Table 2 – continued from previous page

| Drug name      | DrugBank ID | Disease name                                           | Disease CUI |
|----------------|-------------|--------------------------------------------------------|-------------|
| Bilastine      | DB11591     | Tularemia                                              | C0041351    |
| Bilastine      | DB11591     | Glaucoma, Open-Angle                                   | C0017612    |
| Bilastine      | DB11591     | Chronic Tubotympanic Suppurative Otitis Media          | C0155440    |
| Bilastine      | DB11591     | Septicemia Candida                                     | C0349009    |
| Bilastine      | DB11591     | Arthritis, Gouty                                       | C0003868    |
| Bilastine      | DB11591     | Complex Dyslipidemia                                   | C3875286    |
| Levoleucovorin | DB11596     | Irritable Bowel Syndrome Characterized By Constipation | C1868889    |

Table 2: SNF-NN predicted drug-disease interactions

## References

- [1] D. S. Wishart, Y. D. Feunang, A. C. Guo, E. J. Lo, A. Marcu, J. R. Grant, T. Sajed, D. Johnson, C. Li, Z. Sayeeda *et al.*, “Drugbank 5.0: a Major Update to the Drugbank Database for 2018,” *Nucleic Acids Research*, vol. 46, no. D1, pp. D1074–D1082, 2017.
- [2] Y. Wang, S. Zhang, F. Li, Y. Zhou, Y. Zhang, Z. Wang, R. Zhang, J. Zhu, Y. Ren, Y. Tan *et al.*, “Therapeutic Target Database 2020: Enriched Resource for Facilitating Research and Early Development of Targeted Therapeutics,” *Nucleic Acids Research*, p. 1, 2019.
- [3] T. Hernandez-Boussard, M. Whirl-Carrillo, J. M. Hebert, L. Gong, R. Owen, M. Gong, W. Gor, F. Liu, C. Truong, R. Whaley *et al.*, “The Pharmacogenetics and Pharmacogenomics Knowledge Base: Accentuating the Knowledge,” *Nucleic Acids Research*, vol. 36, no. suppl\_1, pp. D913–D918, 2007.
- [4] A. Gaulton, A. Hersey, M. Nowotka, A. P. Bento, J. Chambers, D. Mendez, P. Mutowo, F. Atkinson, L. J. Bellis, E. Cibrián-Uhalte *et al.*, “The ChEMBL Database in 2017,” *Nucleic Acids Research*, vol. 45, no. D1, pp. D945–D954, 2016.
- [5] A. J. Pawson, J. L. Sharman, H. E. Benson, E. Faccenda, S. P. Alexander, O. P. Buneman, A. P. Davenport, J. C. McGrath, J. A. Peters, C. Southan *et al.*, “The IUPHAR/BPS Guide to PHARMACOLOGY: an Expert-driven Knowledgebase of Drug Targets and Their Ligands,” *Nucleic Acids Research*, vol. 42, no. D1, pp. D1098–D1106, 2014.
- [6] T. Liu, Y. Lin, X. Wen, R. N. Jorissen, and M. K. Gilson, “BindingDB: a Web-accessible Database of Experimentally Determined Protein–ligand Binding Affinities,” *Nucleic Acids Research*, vol. 35, no. suppl\_1, pp. D198–D201, 2007.
- [7] T. U. Consortium, “UniProt: The Universal Protein Knowledgebase,” *Nucleic Acids Research*, vol. 45, no. D1, pp. D158–D169, 2016.
- [8] L. Breuza, S. Poux, A. Estreicher, M. L. Famiglietti, M. Magrane, M. Tognolli, A. Bridge, D. Baratin, and N. Redaschi, “The UniProtKB Guide to the Human Proteome,” *Database*, vol. 2016, 2016.
- [9] M. Kuhn, I. Letunic, L. J. Jensen, and P. Bork, “The SIDER Database of Drugs and Side Effects,” *Nucleic Acids Research*, vol. 44, no. D1, pp. D1075–D1079, 2015.
- [10] F. Cheng, W. Li, Z. Wu, X. Wang, C. Zhang, J. Li, G. Liu, and Y. Tang, “Prediction of Polypharmacological Profiles of Drugs by the Integration of Chemical, Side effect, and Therapeutic Space,” *Journal of Chemical Information and Modeling*, vol. 53, no. 4, pp. 753–762, 2013.
- [11] M. Kuhn, M. Campillos, I. Letunic, L. J. Jensen, and P. Bork, “A Side Effect Resource to Capture Phenotypic Effects of Drugs,” *Molecular Systems Biology*, vol. 6, no. 1, 2010.

- 
- [12] A. P. Davis, B. L. King, S. Mockus, C. G. Murphy, C. Saraceni-Richards, M. Rosenstein, T. Wiegiers, and C. J. Mattingly, "The Comparative Toxicogenomics Database: Update 2011," *Nucleic Acids Research*, vol. 39, no. suppl\_1, pp. D1067–D1072, 2010.
- [13] C. E. Lipscomb, "Medical Subject Headings (MeSH)," *Bulletin of the Medical Library Association*, vol. 88, no. 3, p. 265, 2000.
- [14] O. Bodenreider, "The Unified Medical Language System (UMLS): Integrating Biomedical Terminology," *Nucleic Acids Research*, vol. 32, no. suppl\_1, pp. D267–D270, 2004.
- [15] S. Kim, P. A. Thiessen, E. E. Bolton, J. Chen, G. Fu, A. Gindulyte, L. Han, J. He, S. He, B. A. Shoemaker *et al.*, "Pubchem Substance and Compound Databases," *Nucleic Acids Research*, vol. 44, no. D1, pp. D1202–D1213, 2015.
- [16] C. Steinbeck, Y. Han, S. Kuhn, O. Horlacher, E. Luttmann, and E. Willighagen, "The Chemistry Development Kit (CDK): an open-source Java Library for Chemo- and Bioinformatics," *Journal of Chemical Information and Computer Sciences*, vol. 43, no. 2, pp. 493–500, 2003.
- [17] G. O. Consortium, "The Gene Ontology Resource: 20 Years and Still Going Strong," *Nucleic Acids Research*, vol. 47, no. D1, pp. D330–D338, 2019.
- [18] P. Resnik, "Semantic Similarity in a Taxonomy: an Information-based Measure and its Application to Problems of Ambiguity in Natural Language," *Journal of Artificial Intelligence Research*, vol. 11, pp. 95–130, 1999.
- [19] D. S. Wishart, Y. D. Feunang, A. Marcu, A. C. Guo, K. Liang, R. Vázquez-Fresno, T. Sajed, D. Johnson, C. Li, N. Karu *et al.*, "HMDB 4.0: The Human Metabolome Database for 2018," *Nucleic Acids Research*, vol. 46, no. D1, pp. D608–D617, 2018.
- [20] E. Boutet, D. Lieberherr, M. Tognolli, M. Schneider, P. Bansal, A. J. Bridge, S. Poux, L. Bougueleret, and I. Xenarios, "UniProtKB/Swiss-Prot, the Manually Annotated Section of the UniProt KnowledgeBase: How to Use the Entry View," in *Plant Bioinformatics*. Springer, 2016, pp. 23–54.
- [21] M. Kanehisa and S. Goto, "KEGG: Kyoto Encyclopedia of Genes and Genomes," *Nucleic Acids Research*, vol. 28, no. 1, pp. 27–30, 2000.
- [22] T. F. Smith, M. S. Waterman, and C. Burks, "The Statistical Distribution of Nucleic Acid Similarities," *Nucleic Acids Research*, vol. 13, no. 2, pp. 645–656, 1985.
- [23] A. P. Davis, C. J. Grondin, R. J. Johnson, D. Sciaky, R. McMorran, J. Wiegiers, T. C. Wiegiers, and C. J. Mattingly, "The Comparative Toxicogenomics Database: Update 2019," *Nucleic Acids Research*, vol. 47, no. D1, pp. D948–D954, 2019.
- [24] H. L. Rehm, J. S. Berg, L. D. Brooks, C. D. Bustamante, J. P. Evans, M. J. Landrum, D. H. Ledbetter, D. R. Maglott, C. L. Martin, R. L. Nussbaum *et al.*, "ClinGen—the Clinical Genome Resource," *New England Journal of Medicine*, vol. 372, no. 23, pp. 2235–2242, 2015.
- [25] S. Köhler, L. Carmody, N. Vasilevsky, J. O. B. Jacobsen, D. Danis, J.-P. Gouridine, M. Gargano, N. L. Harris, N. Matentzoglou, J. A. McMurry *et al.*, "Expansion of the Human Phenotype Ontology (HPO) Knowledge Base and Resources," *Nucleic Acids Research*, vol. 47, no. D1, pp. D1018–D1027, 2019.
- [26] IBI Group. (2020, July) BeFree. [Online]. Available: <http://ibi.imim.es/tools/befree/>
- [27] A. Bravo, M. Cases, N. Queral-Rosinach, F. Sanz, and L. Furlong, "A Knowledge-driven Approach to Extract Disease-related Biomarkers from the Literature," *BioMed Research International*, vol. 2014, 2014.
- [28] À. Bravo, J. Piñero, N. Queral-Rosinach, M. Rautschka, and L. I. Furlong, "Extraction of Relations Between Genes and Diseases from Text and Large-scale Data Analysis: Implications for Translational Research," *BMC Bioinformatics*, vol. 16, no. 1, p. 55, 2015.

- [29] M. J. Li, Z. Liu, P. Wang, M. P. Wong, M. R. Nelson, J.-P. A. Kocher, M. Yeager, P. C. Sham, S. J. Chanock, Z. Xia *et al.*, “GWASdb v2: an Update Database for Human Genetic Variants Identified by Genome-wide Association Studies,” *Nucleic Acids Research*, vol. 44, no. D1, pp. D869–D876, 2016.
- [30] S. T. Sherry, M.-H. Ward, M. Kholodov, J. Baker, L. Phan, E. M. Smigielski, and K. Sirotkin, “dbSNP: The NCBI Database of Genetic Variation,” *Nucleic Acids Research*, vol. 29, no. 1, pp. 308–311, 2001.
- [31] P. Thomas, T. Rocktäschel, J. Hakenberg, Y. Lichtblau, and U. Leser, “SETH Detects and Normalizes Genetic Variants in Text,” *Bioinformatics*, vol. 32, no. 18, pp. 2883–2885, 2016.
- [32] R. E. Drury, D. O’Connor, and A. J. Pollard, “The Clinical Application of microRNAs in Infectious Disease,” *Frontiers in Immunology*, vol. 8, p. 1182, 2017.
- [33] L. Cheng, Y. Hu, J. Sun, M. Zhou, and Q. Jiang, “DincRNA: a Comprehensive Web-based Bioinformatics Toolkit for Exploring Disease Associations and ncRNA Function,” *Bioinformatics*, vol. 34, no. 11, pp. 1953–1956, 2018.
- [34] R.-W. Yao, Y. Wang, and L.-L. Chen, “Cellular Functions of Long Noncoding RNAs,” *Nature Cell Biology*, vol. 21, no. 5, pp. 542–551, 2019.
- [35] N. Freimer and C. Sabatti, “The Human Phenome Project,” *Nature Genetics*, vol. 34, no. 1, pp. 15–21, 2003.
- [36] X. Wu, Q. Liu, and R. Jiang, “Align human interactome with phenome to identify causative genes and networks underlying disease families,” *Bioinformatics*, vol. 25, no. 1, pp. 98–104, 2009.
- [37] A. Gottlieb, G. Y. Stein, E. Ruppin, and R. Sharan, “PREDICT: a Method for Inferring Novel Drug Indications with Application to Personalized Medicine,” *Molecular Systems Biology*, vol. 7, no. 1, 2011.
- [38] G. K. Mazandu, E. R. Chimusa, and N. J. Mulder, “Gene Ontology Semantic Similarity Tools: Survey on Features and Challenges for Biological Knowledge Discovery,” *Briefings in Bioinformatics*, vol. 18, no. 5, pp. 886–901, 2017.
- [39] “Network-based elucidation of human disease similarities reveals common functional modules enriched for pluripotent drug targets.”
- [40] J. Piñero, J. M. Ramírez-Anguita, J. Saüch-Pitarch, F. Ronzano, E. Centeno, F. Sanz, and L. I. Furlong, “The disgenet knowledge platform for disease genomics: 2019 update,” *Nucleic acids research*, vol. 48, no. D1, pp. D845–D855, 2020.
- [41] P. Resnik, “Using Information Content to Evaluate Semantic Similarity in A Taxonomy,” *arXiv preprint cmp-lg/9511007*, 1995.
- [42] D. Lin *et al.*, “An Information-theoretic Definition of Similarity,” in *ICML*, vol. 98, no. 1998, 1998, pp. 296–304.
- [43] J. Z. Wang, Z. Du, R. Payattakool, P. S. Yu, and C.-F. Chen, “A New Method to Measure the Semantic Similarity of GO Terms,” *Bioinformatics*, vol. 23, no. 10, pp. 1274–1281, 2007.
- [44] S. Mathur and D. Dinakarpandian, “Finding Disease Similarity Based on Implicit Semantic Similarity,” *Journal of Biomedical Informatics*, vol. 45, no. 2, pp. 363–371, 2012.
- [45] L. Cheng, J. Li, P. Ju, J. Peng, and Y. Wang, “SemFunSim: a New Method for Measuring Disease Similarity by Integrating Semantic and Gene Functional Association,” *PLOS One*, vol. 9, no. 6, p. e99415, 2014.
